# Supplementary material for: Ferrocenyl-based di- and trinuclear lanthanide complexes: solid state structures, (spectro)electrochemical and DFT studies
Source: Royal Society of Chemistry journal article supplement (doi:10.1039/d3dt00812f), 2023-01-01
Supplement: d3dt00812f1.pdf [file d3dt00812f1.pdf]

**Electronic Supplementary Information (ESI)**

**Ferrocenyl-based Di- and Trinuclear Lanthanide Complexes: Solid  
State structures, (Spectro)Electrochemical and DFT Studies**

Ahmed Khalladi,<sup>a)</sup> Eduard Kovalski,<sup>a)</sup> Mohammad A. Abdulmalic,<sup>a)</sup> Tobias Rüffer,<sup>b)</sup>

Qing Yuan,<sup>a)</sup> H. Naïli,<sup>c)</sup> Marcus Korb,<sup>\*,d)</sup> and Heinrich Lang<sup>\*,a)</sup>

*a) Technische Universität Chemnitz, Research Center for Materials, Architectures and Integration of Nanomembranes (MAIN), Research Group Organometallic Chemistry, Rosenbergstraße 6, D-09126 Chemnitz, Germany*

*b) Technische Universität Chemnitz, Faculty of Natural Sciences, Institute of Chemistry, Inorganic Chemistry, D-09107 Chemnitz, Germany*

*c) University of Sfax, Faculty of Sciences, Department of Chemistry, Solid State Physico-Chemistry Laboratory, PB 1171, 3000 Sfax, Tunisia*

*d) School of Molecular Sciences, The University of Western Australia, Crawley, Perth, WA 6009, Australia*

## Electronic Supplementary Information (ESI)

### Table of Contents

|                                                                                                               |     |
|---------------------------------------------------------------------------------------------------------------|-----|
| <u>IR spectra</u>                                                                                             | S3  |
| <b>Figure S1.</b> IR spectra of <b>2</b> (KBr).                                                               | S3  |
| <b>Figure S2.</b> IR spectra of <b>3</b> (KBr).                                                               | S3  |
| <b>Figure S3.</b> IR spectra of <b>4</b> (KBr).                                                               | S4  |
| <b>Figure S4.</b> IR spectra of <b>5</b> (KBr).                                                               | S4  |
| <b>Figure S5.</b> IR spectra of <b>6</b> (KBr).                                                               | S5  |
| <b>Figure S6.</b> IR spectra of <b>7</b> (KBr).                                                               | S5  |
| <br>                                                                                                          |     |
| <u>Crystal data</u>                                                                                           | S6  |
| <b>Table S1.</b> Most likely coordination polyhedra in complexes <b>2 – 5</b> .                               | S6  |
| <b>Figure S7.</b> ORTEP diagram <b>2 – 5</b> .                                                                | S6  |
| <b>Table S2</b> Most likely coordination polyhedra in complexes <b>6</b> and <b>7</b> .                       | S8  |
| <b>Table S3.</b> Polyhedron overlay orientations of <b>7</b> .                                                | S8  |
| <b>Figure S8</b> Overlay of compounds <b>6</b> and <b>7</b> .                                                 | S7  |
| <b>Table S4</b> The shortest distances in <b>7</b> .                                                          | S9  |
| <b>Figure S9</b> ORTEP diagram of <b>6</b> and <b>7</b> .                                                     | S9  |
| <b>Table S5.</b> Coordination polyhedra in complexes <b>2 – 5</b> o                                           | S10 |
| <b>Table S6.</b> Bond lengths (Å) and angles (°) of complexes <b>6</b> and <b>7</b> .                         | S12 |
| <b>Table S9.</b> Crystallographic data of <b>2 – 5</b> .                                                      | S22 |
| <b>Table S10.</b> Crystallographic data of <b>6</b> and <b>7</b> .                                            | S23 |
| <b>Miscellaneous</b>                                                                                          | S25 |
| <br>                                                                                                          |     |
| <u>Electrochemistry</u>                                                                                       | S18 |
| <b>Figure S10.</b> Cyclic voltammograms of <b>2 – 5</b>                                                       | S18 |
| <b>Table S7.</b> Cyclic voltammetry data of <b>2 – 5</b> . <sup>a)</sup>                                      | S18 |
| <b>Figure S11.</b> Cyclic voltammograms of <b>2 – 5</b> .                                                     | S19 |
| <b>Figure S12.</b> Cyclic voltammogram of <b>7</b> .                                                          | S19 |
| <br>                                                                                                          |     |
| Computational Chemistry                                                                                       | S20 |
| <b>Table S8.</b> Effective ion radii of Gd, Tb, Y and La.                                                     | S20 |
| <b>Figure S13.</b> Frontier orbitals of <b>Y<sub>t</sub></b> .                                                | S20 |
| <b>Figure S14.</b> frontier orbitals of [ <b>Y</b> ] <sup>+</sup> and [ <b>Y<sub>t</sub></b> ] <sup>+</sup> . | S21 |
| <br>                                                                                                          |     |
| Reference                                                                                                     | S30 |

## Electronic Supplementary Information (ESI)

### 1- IR spectra

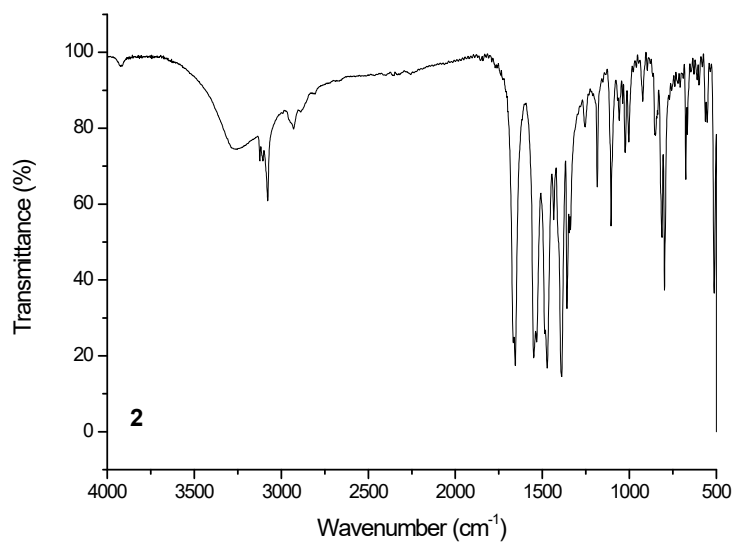

**Figure S1.** IR spectra of **2** (KBr).

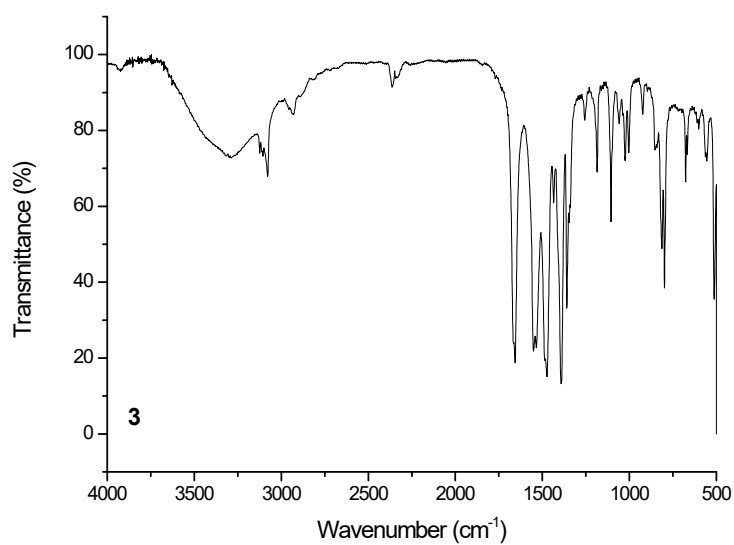

**Figure S2.** IR spectra of **3** (KBr).

## Electronic Supplementary Information (ESI)

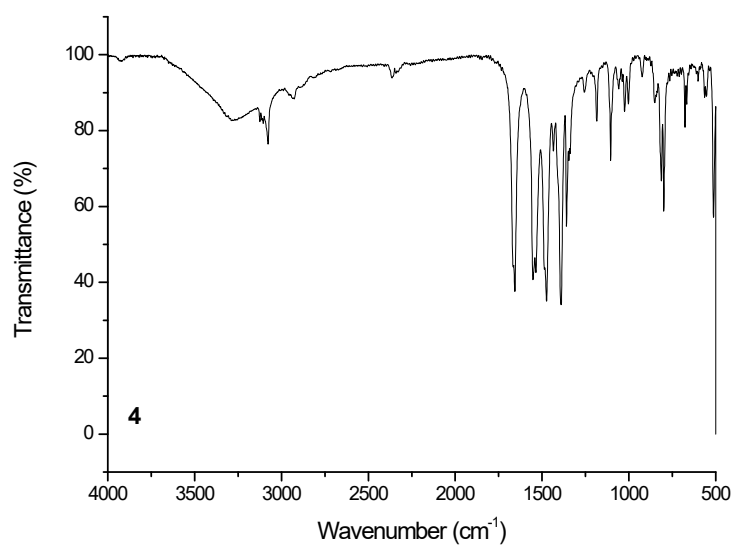

Figure S3. IR spectra of **4** (KBr).

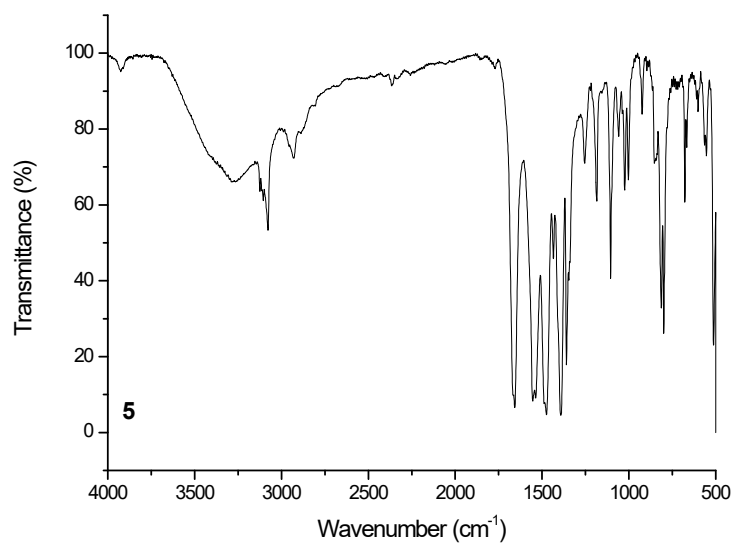

Figure S4. IR spectra of **5** (KBr).

## Electronic Supplementary Information (ESI)

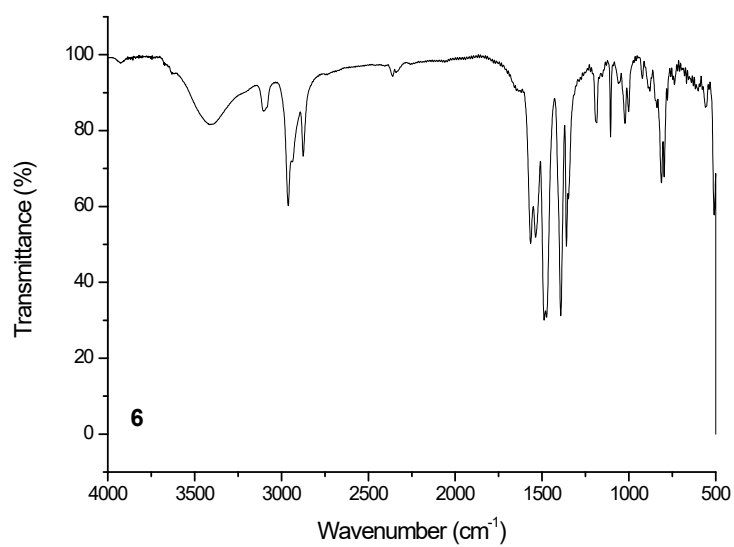

**Figure S5.** IR spectra of **6** (KBr).

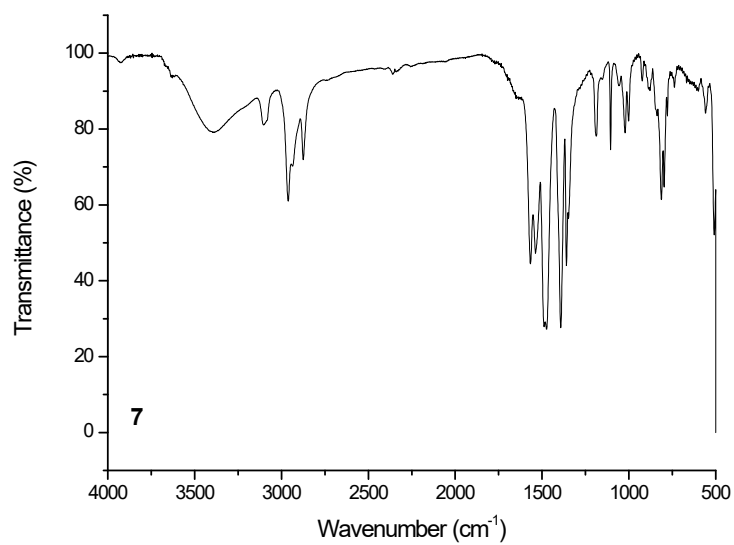

**Figure S6.** IR spectra of **7** (KBr).

## Electronic Supplementary Information (ESI)

### 2. Crystal data

**Table S1.** Comparison of the most likely coordination polyhedra in complexes **2** – **5** obtained via the SHAPE program package.<sup>1</sup>

| Compound | M  | JCSAPR <sup>1)</sup> | CSAPR <sup>2)</sup> | JTCTPR <sup>3)</sup> | TCTPR <sup>4)</sup> | $\Delta^{3-4}$ | MFF <sup>5)</sup> |
|----------|----|----------------------|---------------------|----------------------|---------------------|----------------|-------------------|
| <b>2</b> | Sm | 3.151                | 2.801               | 2.683                | 2.542               | 141            | 2.774             |
| <b>3</b> | Eu | 3.094                | 2.765               | 2.576                | 2.529               | 47             | 2.813             |
| <b>4</b> | Gd | 3.08                 | 2.813               | 2.525                | 2.568               | -43            | 2.853             |
| <b>5</b> | Tb | 2.937                | 2.824               | 2.423                | 2.553               | -130           | 2.883             |

1) JCSAPR = Capped square antiprism; 2) CSAPR = Spherical capped square antiprism; 3) JTCTPR = Tricapped trigonal prism; 4) TCTPR = Spherical tricapped trigonal prism; 5) MFF = Muffin.

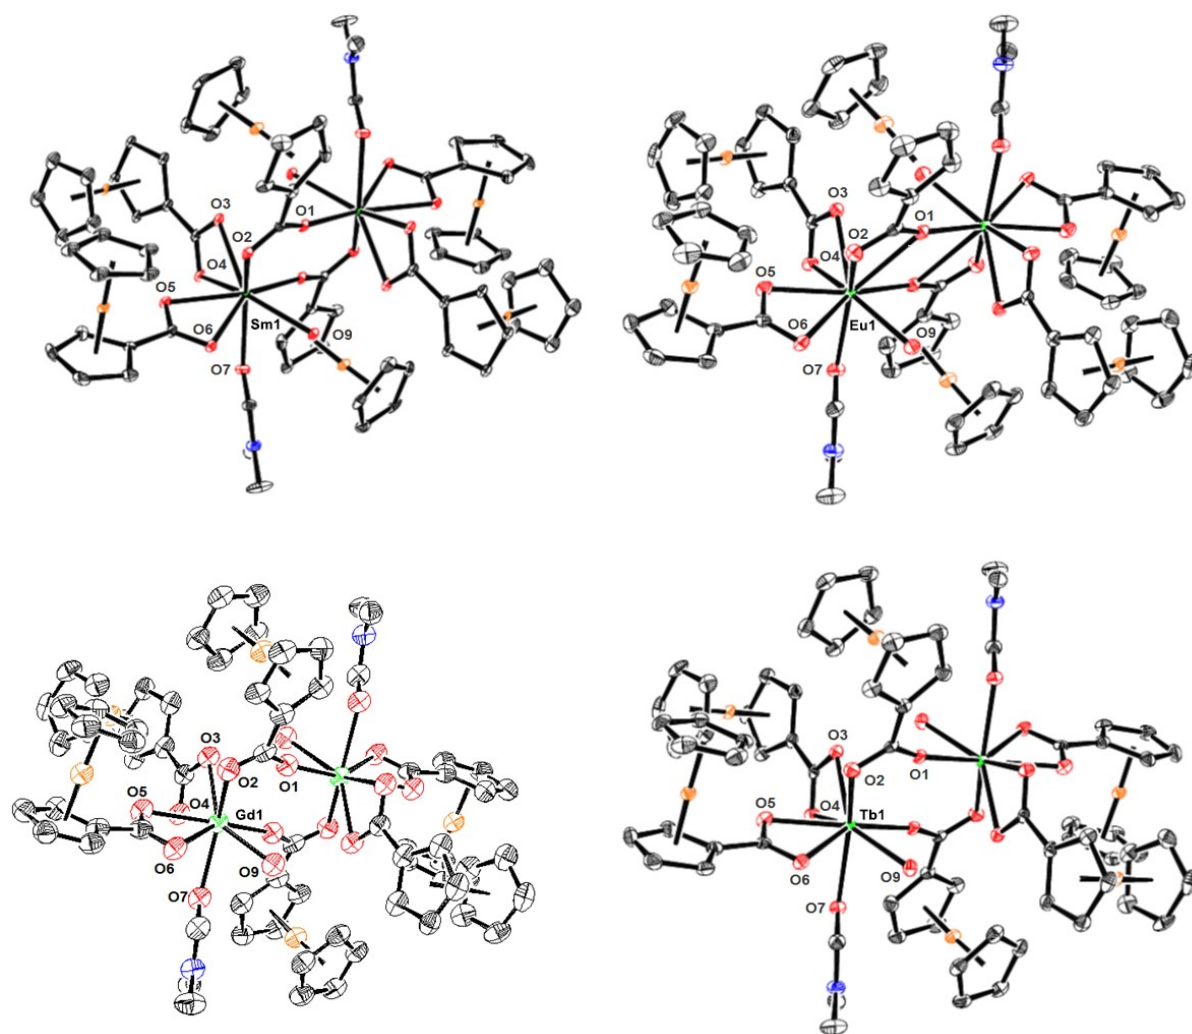

**Figure S7.** ORTEP diagram (50 % probability level) of the molecular structures of **2** (top, left), **3** (top, right), **4** (bottom, left) and **5** (bottom, right) with the atom-numbering scheme. All hydrogen atoms have been omitted for clarity. Symmetry operation for generating equivalent atoms:  $1-x, 1-y, -z$ .

## Electronic Supplementary Information (ESI)

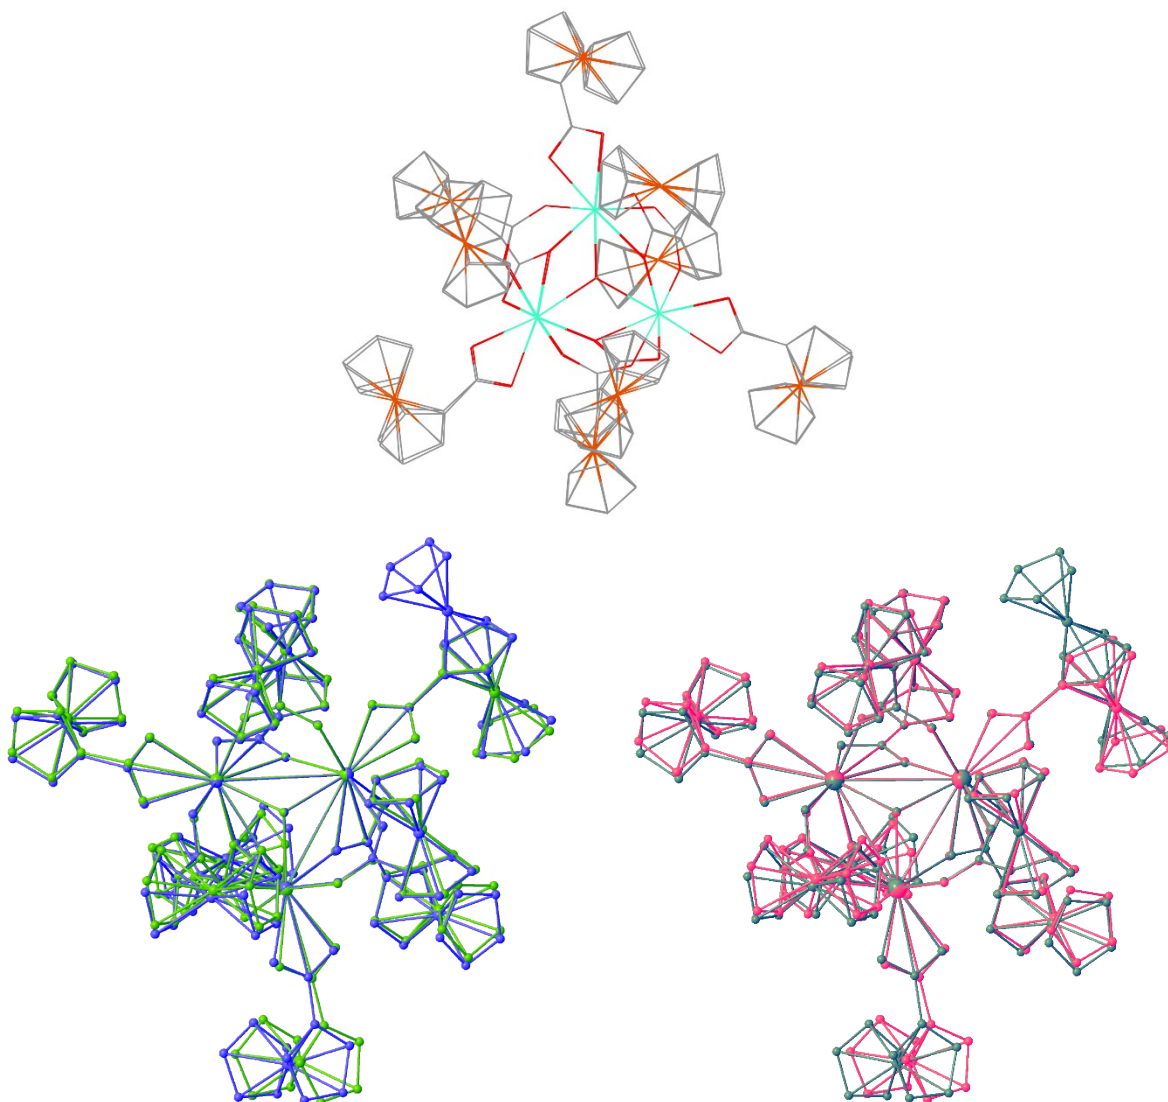

**Figure S8.** Top: Overlay of compounds **6** and **7** based on their Ln, Fe and  $\mu^3$ -O atoms: RMSD: 0.0679 (0.012 Å if only Ln atoms are considered). Bottom: Overlay molecules 1 & 2 in **6** (Left; RMSD: 0.028 Å, based on Gd); in **7** (Right: RMSD: 0.026 Å)

## Electronic Supplementary Information (ESI)

**Table S2.** Comparison of the most likely coordination polyhedra in complexes **6** and **7** obtained via the SHAPE program.<sup>1</sup>

| Compound | Atom | SAPR    | TDD     | BTPR    | JGBF    | JETBPY* | JBTPR   | JSD     |
|----------|------|---------|---------|---------|---------|---------|---------|---------|
| <b>6</b> | Gd1  | 27.098, | 26.339, | 26.898, | 27.200, | 17.632, | 23.308, | 23.664, |
|          | Gd2  | 24.283, | 24.900, | 23.324, | 27.128, | 17.578, | 20.694, | 18.623, |
|          | Gd3  | 20.239, | 21.117, | 20.076, | 24.155, | 18.988, | 17.175, | 17.160, |
|          | Gd4  | 24.924, | 25.617, | 23.683, | 25.996, | 17.404, | 20.682, | 19.301, |
|          | Gd5  | 20.748, | 21.236, | 20.433, | 24.265, | 19.466, | 17.442, | 17.077, |
|          | Gd6  | 27.013, | 26.673, | 27.320, | 26.679, | 18.548, | 24.139, | 24.385, |
| <b>7</b> | Tb1  | 20.251, | 21.128, | 20.112, | 23.952, | 18.558, | 17.265, | 17.330, |
|          | Tb2  | 27.226, | 26.408, | 26.932, | 27.003, | 17.642, | 23.465, | 23.697, |
|          | Tb3  | 24.459, | 25.070, | 23.633, | 27.468, | 17.773, | 21.058, | 18.888, |
|          | Tb11 | 24.899, | 25.648, | 23.859, | 26.328, | 17.500, | 21.030, | 19.444, |
|          | Tb12 | 20.342, | 20.933, | 20.113, | 24.161, | 19.556, | 17.121, | 16.846, |
|          | Tb13 | 26.782, | 26.426, | 27.186, | 26.542, | 18.595, | 23.974, | 24.208, |

SAPR = Square antiprism, TDD-8 = triangular dodecahedron, JETBPY\* = Johnson elongated triangular bipyramid J14, JBTPR = Biaugmented trigonal prism J50, BTPR = Biaugmented trigonal prism, JSD = Snub diphenoid J84. \* Could not be detected within the coordination spheres, thus the next closest regular shape was chosen.

**Table S3.** Orientation analysis of individual polyhedron orientations of **7** via the SHAPE program.<sup>1</sup>

| Center     | Orientation  | prism  | pyramid       | average | average all   | capps    |
|------------|--------------|--------|---------------|---------|---------------|----------|
| <b>TB1</b> | <b>Tb1/2</b> | 17.957 | 23.518/25.3   | 24.409  | <b>21.183</b> | O1, O3   |
|            | Tb3          | 22.849 | 30.48/26.923  | 28.7015 | 25.77525      | O2, O8   |
| <b>TB2</b> | <b>Tb1/2</b> | 26.805 | 27.133/30.933 | 29.033  | <b>27.919</b> | O1, O5   |
|            | Tb3          | 26.782 | 31.501/31.579 | 31.54   | 29.161        | O4, O8   |
| <b>TB3</b> | Tb1/2        | 25.772 | 31.042/30.757 | 30.8995 | 28.33575      | O1, O7   |
|            | <b>Tb3</b>   | 21.872 | 28.417/31.871 | 30.144  | <b>26.008</b> | O15, O16 |



## Electronic Supplementary Information (ESI)

**Table S4.** The shortest distances between individual ferrocenyl groups in **7**, based on their Fe···Fe and ipso carbon C···C distances.

| Fc <sup>a)</sup> | pattern       | M <sup>b)</sup> | Fe···Fe   | Fc' | pattern       | M'  | Fc <sup>a)</sup> | pattern       | M <sup>b)</sup> | C···C     | Fc' | pattern       | M'  |
|------------------|---------------|-----------------|-----------|-----|---------------|-----|------------------|---------------|-----------------|-----------|-----|---------------|-----|
| 1                | $\kappa^2$    | 1               | 6.7501(3) | 6   | $\mu\kappa^3$ | 2,1 | 1                | $\kappa^2$    | 1               | 5.5221(2) | 6   | $\mu\kappa^3$ | 2,1 |
| 7                | $\kappa^2$    | 2               | 6.2146(2) | 2   | $\mu\kappa^3$ | 3,2 | 7                | $\kappa^2$    | 2               | 5.7192(2) | 2   | $\mu\kappa^3$ | 3,2 |
| 5                | $\kappa^2$    | 3               | 6.5990(3) | 8   | $\mu\kappa^3$ | 1,3 | 5                | $\kappa^2$    | 3               | 5.8202(2) | 9   | $\mu\kappa^2$ | 3,1 |
| 3                | $\mu\kappa^2$ | 2,1             | 6.4910(3) | 4   | $\mu\kappa^2$ | 3,2 | 3                | $\mu\kappa^2$ | 2,1             | 6.3893(2) | 1   | $\kappa^2$    | 1   |
| 9                | $\mu\kappa^2$ | 3,1             | 6.7446(2) | 3   | $\mu\kappa^2$ | 2,1 | 9                | $\mu\kappa^2$ | 3,1             | 5.8202(2) | 5   | $\kappa^2$    | 3   |
| 4                | $\mu\kappa^2$ | 3,2             | 6.4910(3) | 3   | $\mu\kappa^2$ | 2,1 | 4                | $\mu\kappa^2$ | 3,2             | 6.0406(2) | 2   | $\mu\kappa^3$ | 3,2 |
| 8                | $\mu\kappa^3$ | 1,3             | 6.5990(3) | 5   | $\kappa^2$    | 3   | 8                | $\mu\kappa^3$ | 1,3             | 5.4155(2) | 6   | $\mu\kappa^3$ | 2,1 |
| 6                | $\mu\kappa^3$ | 2,1             | 6.7501(3) | 1   | $\kappa^2$    | 1   | 6                | $\mu\kappa^3$ | 2,1             | 5.4155(2) | 8   | $\mu\kappa^3$ | 1,3 |
| 2                | $\mu\kappa^3$ | 3,2             | 6.2146(2) | 7   | $\kappa^2$    | 2   | 2                | $\mu\kappa^3$ | 3,2             | 5.7054(2) | 6   | $\mu\kappa^3$ | 2,1 |

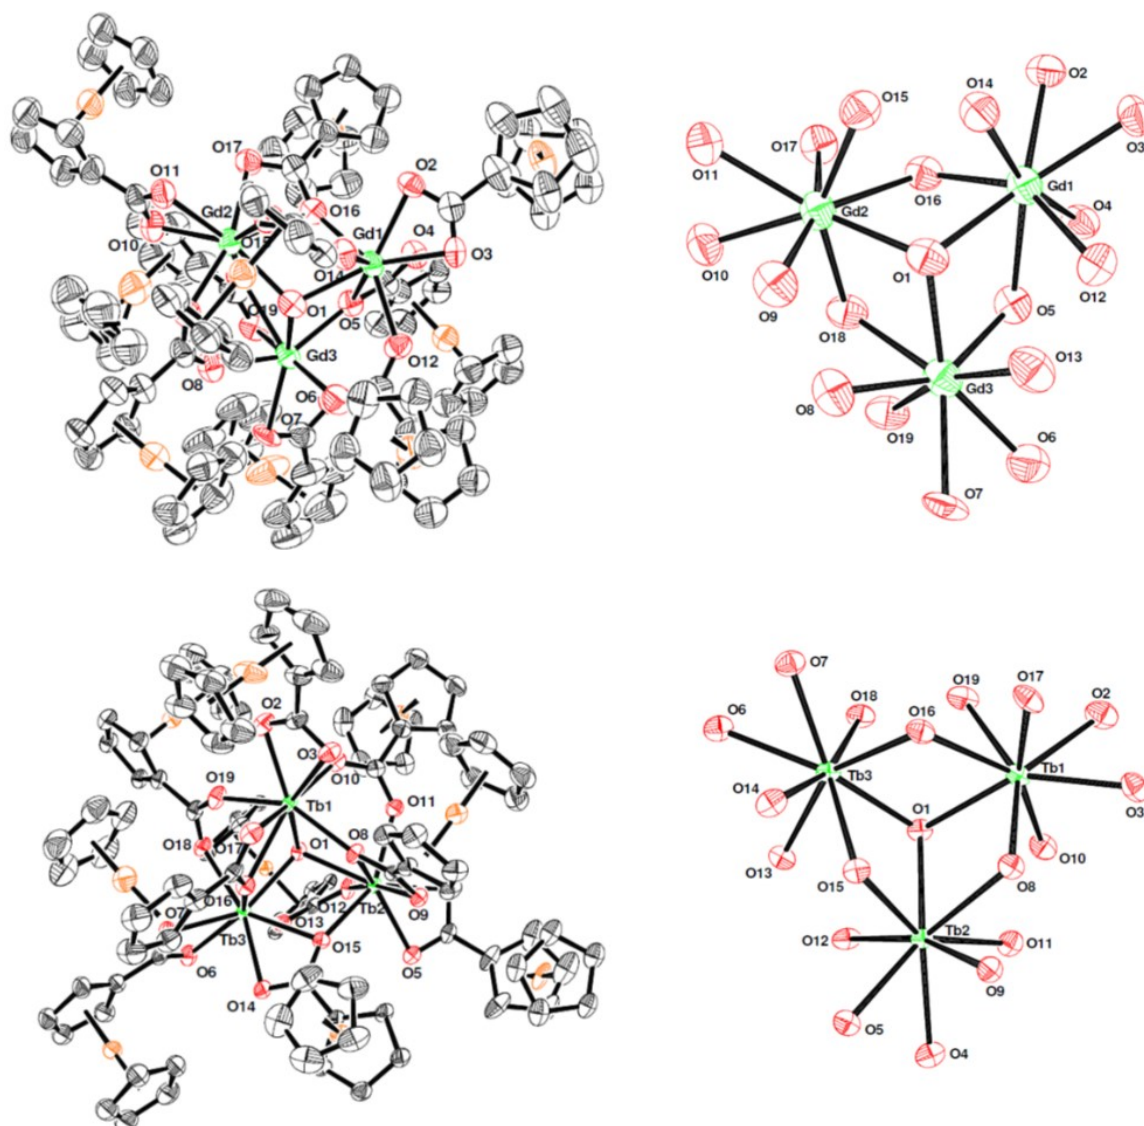

**Figure S9.** ORTEP diagram (50% probability level) of the molecular structures of **6** (top) and **7** (bottom) with the atom numbering scheme. All hydrogen atoms have been omitted for clarity.

## Electronic Supplementary Information (ESI)

**Table S4A.** Short Fe...Fe and <sup>i</sup>C...<sup>i</sup>C distances for both molecules in the symmetric unit of **7** and the reference labeling in DFT structure **Y**.

| Fc (DFT) | Fc (X-Ray) | mode          | Fc (X-Ray) | mode          | Fe...Fe / Å |             | <sup>i</sup> C... <sup>i</sup> C / Å |           |
|----------|------------|---------------|------------|---------------|-------------|-------------|--------------------------------------|-----------|
|          |            |               |            |               | M 1         | M 2         | M 1                                  | M 2       |
| 5        | 1          | $\kappa^2$    | 1          | $\kappa^2$    |             |             |                                      |           |
|          |            |               | 2          | $\kappa^2$    | 12.9154(8)  | 12.749(3)   | 8.5711(6)                            | 8.583(11) |
|          |            |               | 3          | $\kappa^2$    | 12.3945(5)  | 12.791(3)   | 8.5602(4)                            | 8.615(11) |
|          |            |               | 4          | $\mu\kappa^3$ | 6.7173(3)   | 6.403(2)    | 5.0183(3)                            | 4.978(10) |
|          |            |               | 5          | $\mu\kappa^2$ | 9.3715(4)   | 9.563(3)    | 4.2335(2)                            | 4.299(11) |
|          |            |               | 6          | $\mu\kappa^2$ | 12.2757(6)  | 12.574(2)   | 8.0494(5)                            | 8.111(11) |
|          |            |               | 7          | $\mu\kappa^3$ | 10.2367(6)  | 9.890(3)    | 7.6630(4)                            | 7.609(10) |
|          |            |               | 8          | $\mu\kappa^3$ | 6.6844(3)   | 6.944(3)    | 4.5254(2)                            | 4.469(11) |
|          |            |               | 9          | $\mu\kappa^2$ | 7.7630(4)   | 8.314(3)    | 5.1861(2)                            | 5.240(10) |
| 1        | 2          | $\kappa^2$    | 1          | $\kappa^2$    | 12.9154(8)  | 12.749(3)   | 8.5711(6)                            | 8.583(11) |
|          |            |               | 2          | $\kappa^2$    |             |             |                                      |           |
|          |            |               | 3          | $\kappa^2$    | 12.4977(6)  | 12.2784(18) | 8.4565(4)                            | 8.304(10) |
|          |            |               | 4          | $\mu\kappa^3$ | 6.9014(5)   | 6.9597(18)  | 4.3895(3)                            | 4.365(10) |
|          |            |               | 5          | $\mu\kappa^2$ | 9.0753(4)   | 9.1734(18)  | 5.3218(3)                            | 5.366(11) |
|          |            |               | 6          | $\mu\kappa^2$ | 10.2366(6)  | 10.1913(16) | 4.4434(2)                            | 4.317(10) |
|          |            |               | 7          | $\mu\kappa^3$ | 6.8045(4)   | 6.7193(19)  | 4.7889(3)                            | 4.783(10) |
|          |            |               | 8          | $\mu\kappa^3$ | 12.5879(5)  | 12.522(2)   | 7.6843(4)                            | 7.687(11) |
|          |            |               | 9          | $\mu\kappa^2$ | 13.2092(6)  | 13.2409(17) | 8.2457(4)                            | 8.228(10) |
| 7        | 3          | $\kappa^2$    | 1          | $\kappa^2$    | 12.3945(5)  | 12.791(3)   | 8.5602(4)                            | 8.615(11) |
|          |            |               | 2          | $\kappa^2$    | 12.4977(6)  | 12.2784(18) | 8.4565(4)                            | 8.304(10) |
|          |            |               | 3          | $\kappa^2$    |             |             |                                      |           |
|          |            |               | 4          | $\mu\kappa^3$ | 12.4269(6)  | 12.6055(18) | 7.6941(4)                            | 7.687(10) |
|          |            |               | 5          | $\mu\kappa^2$ | 13.2146(8)  | 12.995(2)   | 8.2861(5)                            | 8.201(11) |
|          |            |               | 6          | $\mu\kappa^2$ | 8.8524(5)   | 8.2648(19)  | 5.2754(3)                            | 5.189(11) |
|          |            |               | 7          | $\mu\kappa^3$ | 7.2242(4)   | 7.5043(16)  | 4.4670(2)                            | 4.455(10) |
|          |            |               | 8          | $\mu\kappa^3$ | 6.1575(3)   | 6.443(2)    | 4.9358(2)                            | 5.020(10) |
|          |            |               | 9          | $\mu\kappa^2$ | 9.9393(5)   | 9.8524(18)  | 4.3511(2)                            | 4.352(11) |
| 8        | 4          | $\mu\kappa^3$ | 1          | $\kappa^2$    | 6.7173(3)   | 6.403(2)    | 5.0183(3)                            | 4.978(10) |
|          |            |               | 2          | $\kappa^2$    | 6.9014(5)   | 6.9597(18)  | 4.3895(3)                            | 4.365(10) |
|          |            |               | 3          | $\kappa^2$    | 12.4269(6)  | 12.6055(18) | 7.6941(4)                            | 7.687(10) |
|          |            |               | 4          | $\mu\kappa^3$ |             |             |                                      |           |
|          |            |               | 5          | $\mu\kappa^2$ | 7.8918(4)   | 7.9695(16)  | 4.0836(2)                            | 4.085(10) |
|          |            |               | 6          | $\mu\kappa^2$ | 11.3672(7)  | 11.4352(15) | 5.9790(3)                            | 5.919(10) |
|          |            |               | 7          | $\mu\kappa^3$ | 6.8305(3)   | 6.6944(18)  | 4.2820(2)                            | 4.251(10) |
|          |            |               | 8          | $\mu\kappa^3$ | 9.1256(4)   | 9.2504(19)  | 4.4381(2)                            | 4.486(10) |
|          |            |               | 9          | $\mu\kappa^2$ | 10.4946(6)  | 10.6047(17) | 6.5669(4)                            | 6.559(9)  |
| 9        | 5          | $\mu\kappa^2$ | 1          | $\kappa^2$    | 9.3715(4)   | 9.563(3)    | 4.2335(2)                            | 4.299(11) |
|          |            |               | 2          | $\kappa^2$    | 9.0753(4)   | 9.1734(18)  | 5.3218(3)                            | 5.366(11) |
|          |            |               | 3          | $\kappa^2$    | 13.2146(8)  | 12.995(2)   | 8.2861(5)                            | 8.201(11) |
|          |            |               | 4          | $\mu\kappa^3$ | 7.8918(4)   | 7.9695(16)  | 4.0836(2)                            | 4.085(10) |
|          |            |               | 5          | $\mu\kappa^2$ |             |             |                                      |           |
|          |            |               | 6          | $\mu\kappa^2$ | 6.7516(3)   | 6.8320(17)  | 5.1796(2)                            | 5.144(11) |
|          |            |               | 7          | $\mu\kappa^3$ | 11.0573(5)  | 11.0140(18) | 6.5066(3)                            | 6.521(10) |
|          |            |               | 8          | $\mu\kappa^3$ | 11.2365(7)  | 11.300(2)   | 6.0139(4)                            | 6.003(11) |
|          |            |               | 9          | $\mu\kappa^2$ | 6.8519(3)   | 6.8127(18)  | 5.3690(3)                            | 5.328(10) |
| 4        | 6          | $\mu\kappa^2$ | 1          | $\kappa^2$    | 12.2757(6)  | 12.574(2)   | 8.0494(5)                            | 8.111(11) |
|          |            |               | 2          | $\kappa^2$    | 10.2366(6)  | 10.1913(16) | 4.4434(2)                            | 4.317(10) |
|          |            |               | 3          | $\kappa^2$    | 8.8524(5)   | 8.2648(19)  | 5.2754(3)                            | 5.189(11) |
|          |            |               | 4          | $\mu\kappa^3$ | 11.3672(7)  | 11.4352(15) | 5.9790(3)                            | 5.919(10) |
|          |            |               | 5          | $\mu\kappa^2$ | 6.7516(3)   | 6.8320(17)  | 5.1796(2)                            | 5.144(11) |
|          |            |               | 6          | $\mu\kappa^2$ |             |             |                                      |           |
|          |            |               | 7          | $\mu\kappa^3$ | 10.1277(6)  | 10.1012(16) | 4.3097(2)                            | 4.376(11) |
|          |            |               | 8          | $\mu\kappa^3$ | 10.0518(4)  | 10.1021(18) | 6.5601(3)                            | 6.594(11) |
|          |            |               | 9          | $\mu\kappa^2$ | 6.4412(4)   | 6.4693(14)  | 5.1433(3)                            | 5.226(11) |
| 6        | 7          | $\mu\kappa^3$ | 1          | $\kappa^2$    | 10.2367(6)  | 9.890(3)    | 7.6630(4)                            | 7.609(10) |
|          |            |               | 2          | $\kappa^2$    | 6.8045(4)   | 6.7193(19)  | 4.7889(3)                            | 4.783(10) |
|          |            |               | 3          | $\kappa^2$    | 7.2242(4)   | 7.5043(16)  | 4.4670(2)                            | 4.455(10) |
|          |            |               | 4          | $\mu\kappa^3$ | 6.8305(3)   | 6.6944(18)  | 4.2820(2)                            | 4.251(10) |
|          |            |               | 5          | $\mu\kappa^2$ | 11.0573(5)  | 11.0140(18) | 6.5066(3)                            | 6.521(10) |
|          |            |               | 6          | $\mu\kappa^2$ | 10.1277(6)  | 10.1012(16) | 4.3097(2)                            | 4.376(11) |
|          |            |               | 7          | $\mu\kappa^3$ |             |             |                                      |           |
|          |            |               | 8          | $\mu\kappa^3$ | 7.2393(4)   | 7.1040(19)  | 4.3509(3)                            | 4.326(10) |
|          |            |               | 9          | $\mu\kappa^2$ | 11.3362(5)  | 11.3431(17) | 5.9551(3)                            | 5.967(10) |

## Electronic Supplementary Information (ESI)

|   |   |               |   |               |            |             |           |           |
|---|---|---------------|---|---------------|------------|-------------|-----------|-----------|
| 2 | 8 | $\mu\kappa^3$ | 1 | $\kappa^2$    | 6.6844(3)  | 6.944(3)    | 4.5254(2) | 4.469(11) |
|   |   |               | 2 | $\kappa^2$    | 12.5879(5) | 12.522(2)   | 7.6843(4) | 7.687(11) |
|   |   |               | 3 | $\kappa^2$    | 6.1575(3)  | 6.443(2)    | 4.9358(2) | 5.020(10) |
|   |   |               | 4 | $\mu\kappa^3$ | 9.1256(4)  | 9.2504(19)  | 4.4381(2) | 4.486(10) |
|   |   |               | 5 | $\mu\kappa^2$ | 11.2365(7) | 11.300(2)   | 6.0139(4) | 6.003(11) |
|   |   |               | 6 | $\mu\kappa^2$ | 10.0518(4) | 10.1021(18) | 6.5601(3) | 6.594(11) |
|   |   |               | 7 | $\mu\kappa^3$ | 7.2393(4)  | 7.1040(19)  | 4.3509(3) | 4.326(10) |
|   |   |               | 8 | $\mu\kappa^3$ |            |             |           |           |
|   |   |               | 9 | $\mu\kappa^2$ | 7.3231(3)  | 7.4869(18)  | 4.1072(2) | 4.067(9)  |
| 4 | 9 | $\mu\kappa^2$ | 1 | $\kappa^2$    | 7.7630(4)  | 8.314(3)    | 5.1861(2) | 5.240(10) |
|   |   |               | 2 | $\kappa^2$    | 13.2092(6) | 13.2409(17) | 8.2457(4) | 8.228(10) |
|   |   |               | 3 | $\kappa^2$    | 9.9393(5)  | 9.8524(18)  | 4.3511(2) | 4.352(11) |
|   |   |               | 4 | $\mu\kappa^3$ | 10.4946(6) | 10.6047(17) | 6.5669(4) | 6.559(9)  |
|   |   |               | 5 | $\mu\kappa^2$ | 6.8519(3)  | 6.8127(18)  | 5.3690(3) | 5.328(10) |
|   |   |               | 6 | $\mu\kappa^2$ | 6.4412(4)  | 6.4693(14)  | 5.1433(3) | 5.226(11) |
|   |   |               | 7 | $\mu\kappa^3$ | 11.3362(5) | 11.3431(17) | 5.9551(3) | 5.967(10) |
|   |   |               | 8 | $\mu\kappa^3$ | 7.3231(3)  | 7.4869(18)  | 4.1072(2) | 4.067(9)  |
|   |   |               | 9 | $\mu\kappa^2$ |            |             |           |           |

## Electronic Supplementary Information (ESI)

**Table S5.** Bond lengths (Å) and angles (°) of complexes **2** - **5**.

| <b>2</b>                      |            | <b>3</b>                      |           | <b>4</b>                      |            | <b>5</b>                      |            |
|-------------------------------|------------|-------------------------------|-----------|-------------------------------|------------|-------------------------------|------------|
| <i>Bond lengths</i>           |            |                               |           |                               |            |                               |            |
| O(1)-Sm(1)                    | 2.766(4)   | O(1)-Eu(1)                    | 2.779(2)  | O(1)-Gd(1)                    | 2.776(4)   | O(1)-Tb(1)                    | 2.819(2)   |
| O(2)-Sm(1)                    | 2.420(4)   | O(2)-Eu(1)                    | 2.405(2)  | O(2)-Gd(1)                    | 2.385(4)   | O(2)-Tb(1)                    | 2.373(2)   |
| O(3)-Sm(1)                    | 2.446(4)   | O(3)-Eu(1)                    | 2.433(2)  | O(3)-Gd(1)                    | 2.419(3)   | O(3)-Tb(1)                    | 2.4008(19) |
| O(4)-Sm(1)                    | 2.557(4)   | O(4)-Eu(1)                    | 2.548(2)  | O(4)-Gd(1)                    | 2.541(3)   | O(4)-Tb(1)                    | 2.534(2)   |
| O(5)-Sm(1)                    | 2.419(4)   | O(5)-Eu(1)                    | 2.402(2)  | O(5)-Gd(1)                    | 2.383(4)   | O(5)-Tb(1)                    | 2.380(2)   |
| O(6)-Sm(1)                    | 2.521(4)   | O(6)-Eu(1)                    | 2.509(2)  | O(6)-Gd(1)                    | 2.503(3)   | O(6)-Tb(1)                    | 2.491(2)   |
| O(7)-Sm(1)                    | 2.432(4)   | O(7)-Eu(1)                    | 2.422(2)  | O(7)-Gd(1)                    | 2.400(4)   | O(7)-Tb(1)                    | 2.386(2)   |
| O(9)-Sm(1)                    | 2.462(4)   | O(9)-Eu(1)                    | 2.441(2)  | O(9)-Gd(1)                    | 2.422(3)   | O(9)-Tb(1)                    | 2.403(2)   |
| O(1) <sup>i</sup> -Sm(1)      | 2.379(4)   | O(1) <sup>i</sup> -Eu(1)      | 2.359(2)  | O(1) <sup>i</sup> -Gd(1)      | 2.349(4)   | O(1) <sup>i</sup> -Tb(1)      | 2.3178(19) |
| C(1)-O(1)                     | 1.279(7)   | C(1)-O(1)                     | 1.282(4)  | C(1)-O(1)                     | 1.276(6)   | C(1)-O(1)                     | 1.278(3)   |
| C(1)-O(2)                     | 1.238(7)   | C(1)-O(2)                     | 1.256(5)  | C(1)-O(2)                     | 1.259(7)   | C(1)-O(2)                     | 1.255(4)   |
| C(12)-O(3)                    | 1.283(7)   | C(12)-O(3)                    | 1.289(4)  | C(12)-O(3)                    | 1.285(6)   | C(12)-O(3)                    | 1.284(4)   |
| C(12)-O(4)                    | 1.275(7)   | C(12)-O(4)                    | 1.256(4)  | C(12)-O(4)                    | 1.257(7)   | C(12)-O(4)                    | 1.251(4)   |
| C(23)-O(5)                    | 1.281(7)   | C(23)-O(5)                    | 1.287(4)  | C(23)-O(5)                    | 1.274(6)   | C(23)-O(5)                    | 1.273(3)   |
| C(23)-O(6)                    | 1.246(7)   | C(23)-O(6)                    | 1.259(4)  | C(23)-O(6)                    | 1.253(6)   | C(23)-O(6)                    | 1.256(4)   |
| C(34)-O(7)                    | 1.243(8)   | C(34)-O(7)                    | 1.246(5)  | C(34)-O(7)                    | 1.253(7)   | C(34)-O(7)                    | 1.253(4)   |
| C(37)-O(8)                    | 1.221(9)   | C(37)-O(8)                    | 1.223(6)  | C(37)-O(8)                    | 1.236(9)   | C(37)-O(8)                    | 1.226(5)   |
| <i>Bond angles</i>            |            |                               |           |                               |            |                               |            |
| O(1) <sup>i</sup> -Sm(1)-O(5) | 149.22(14) | O(1) <sup>i</sup> -Eu(1)-O(5) | 148.81(8) | O(1) <sup>i</sup> -Gd(1)-O(5) | 149.08(12) | O(1) <sup>i</sup> -Tb(1)-O(5) | 149.18(7)  |
| O(1) <sup>i</sup> -Sm(1)-O(2) | 119.01(14) | O(1) <sup>i</sup> -Eu(1)-O(2) | 119.03(8) | O(1) <sup>i</sup> -Gd(1)-O(2) | 118.77(13) | O(1) <sup>i</sup> -Tb(1)-O(2) | 118.36(7)  |
| O(5)-Sm(1)-O(2)               | 82.64(14)  | O(5)-Eu(1)-O(2)               | 83.16(8)  | O(5)-Gd(1)-O(2)               | 83.11(13)  | O(5)-Tb(1)-O(2)               | 83.35(7)   |
| O(1) <sup>i</sup> -Sm(1)-O(7) | 87.32(14)  | O(1) <sup>i</sup> -Eu(1)-O(7) | 87.09(9)  | O(1) <sup>i</sup> -Gd(1)-O(7) | 87.15(13)  | O(1) <sup>i</sup> -Tb(1)-O(7) | 86.57(7)   |
| O(5)-Sm(1)-O(7)               | 87.48(14)  | O(5)-Eu(1)-O(7)               | 87.19(9)  | O(5)-Gd(1)-O(7)               | 87.17(13)  | O(5)-Tb(1)-O(7)               | 87.78(7)   |
| O(2)-Sm(1)-O(7)               | 140.69(14) | O(2)-Eu(1)-O(7)               | 140.97(8) | O(2)-Gd(1)-O(7)               | 141.29(12) | O(2)-Tb(1)-O(7)               | 141.94(7)  |
| O(1) <sup>i</sup> -Sm(1)-O(3) | 81.59(13)  | O(1) <sup>i</sup> -Eu(1)-O(3) | 81.52(8)  | O(1) <sup>i</sup> -Gd(1)-O(3) | 81.40(12)  | O(1) <sup>i</sup> -Tb(1)-O(3) | 81.68(7)   |
| O(5)-Sm(1)-O(3)               | 80.94(13)  | O(5)-Eu(1)-O(3)               | 81.12(8)  | O(5)-Gd(1)-O(3)               | 81.37(12)  | O(5)-Tb(1)-O(3)               | 81.26(7)   |
| O(2)-Sm(1)-O(3)               | 80.51(13)  | O(2)-Eu(1)-O(3)               | 80.42(8)  | O(2)-Gd(1)-O(3)               | 80.20(12)  | O(2)-Tb(1)-O(3)               | 79.65(7)   |
| O(7)-Sm(1)-O(3)               | 135.25(14) | O(7)-Eu(1)-O(3)               | 135.16(8) | O(7)-Gd(1)-O(3)               | 135.11(12) | O(7)-Tb(1)-O(3)               | 135.36(7)  |
| O(1) <sup>i</sup> -Sm(1)-O(9) | 77.27(14)  | O(1) <sup>i</sup> -Eu(1)-O(9) | 77.02(8)  | O(1) <sup>i</sup> -Gd(1)-O(9) | 76.94(12)  | O(1) <sup>i</sup> -Tb(1)-O(9) | 76.85(7)   |
| O(5)-Sm(1)-O(9)               | 129.92(14) | O(5)-Eu(1)-O(9)               | 130.38(8) | O(5)-Gd(1)-O(9)               | 130.31(12) | O(5)-Tb(1)-O(9)               | 130.47(7)  |
| O(2)-Sm(1)-O(9)               | 83.33(14)  | O(2)-Eu(1)-O(9)               | 83.27(8)  | O(2)-Gd(1)-O(9)               | 83.21(13)  | O(2)-Tb(1)-O(9)               | 82.78(7)   |
| O(7)-Sm(1)-O(9)               | 74.25(14)  | O(7)-Eu(1)-O(9)               | 74.61(9)  | O(7)-Gd(1)-O(9)               | 74.92(13)  | O(7)-Tb(1)-O(9)               | 75.21(7)   |
| O(3)-Sm(1)-O(9)               | 142.66(14) | O(3)-Eu(1)-O(9)               | 142.17(8) | O(3)-Gd(1)-O(9)               | 141.84(13) | O(3)-Tb(1)-O(9)               | 141.31(7)  |
| O(1) <sup>i</sup> -Sm(1)-O(6) | 150.94(13) | O(1) <sup>i</sup> -Eu(1)-O(6) | 150.71(8) | O(1) <sup>i</sup> -Gd(1)-O(6) | 150.64(12) | O(1) <sup>i</sup> -Tb(1)-O(6) | 150.20(7)  |

## Electronic Supplementary Information (ESI)

|                               |            |                               |           |                               |            |                               |            |
|-------------------------------|------------|-------------------------------|-----------|-------------------------------|------------|-------------------------------|------------|
| O(5)-Sm(1)-O(6)               | 52.86(13)  | O(5)-Eu(1)-O(6)               | 53.34(8)  | O(5)-Gd(1)-O(6)               | 53.23(11)  | O(5)-Tb(1)-O(6)               | 53.69(6)   |
| O(2)-Sm(1)-O(6)               | 71.05(14)  | O(2)-Eu(1)-O(6)               | 70.99(8)  | O(2)-Gd(1)-O(6)               | 71.25(13)  | O(2)-Tb(1)-O(6)               | 71.55(7)   |
| O(7)-Sm(1)-O(6)               | 72.70(14)  | O(7)-Eu(1)-O(6)               | 72.94(8)  | O(7)-Gd(1)-O(6)               | 72.95(12)  | O(7)-Tb(1)-O(6)               | 73.41(7)   |
| O(3)-Sm(1)-O(6)               | 127.44(13) | O(3)-Eu(1)-O(6)               | 127.73(8) | O(3)-Gd(1)-O(6)               | 127.91(11) | O(3)-Tb(1)-O(6)               | 128.04(6)  |
| O(9)-Sm(1)-O(6)               | 77.11(14)  | O(9)-Eu(1)-O(6)               | 77.12(8)  | O(9)-Gd(1)-O(6)               | 77.14(12)  | O(9)-Tb(1)-O(6)               | 76.82(7)   |
| O(1) <sup>i</sup> -Sm(1)-O(4) | 77.70(13)  | O(1) <sup>i</sup> -Eu(1)-O(4) | 77.53(8)  | O(1) <sup>i</sup> -Gd(1)-O(4) | 77.47(11)  | O(1) <sup>i</sup> -Tb(1)-O(4) | 77.59(7)   |
| O(5)-Sm(1)-O(4)               | 71.56(13)  | O(5)-Eu(1)-O(4)               | 71.33(8)  | O(5)-Gd(1)-O(4)               | 71.66(11)  | O(5)-Tb(1)-O(4)               | 71.64(7)   |
| O(2)-Sm(1)-O(4)               | 128.53(13) | O(2)-Eu(1)-O(4)               | 128.58(8) | O(2)-Gd(1)-O(4)               | 128.68(12) | O(2)-Tb(1)-O(4)               | 128.58(7)  |
| O(7)-Sm(1)-O(4)               | 82.84(14)  | O(7)-Eu(1)-O(4)               | 82.64(8)  | O(7)-Gd(1)-O(4)               | 82.33(12)  | O(7)-Tb(1)-O(4)               | 82.30(7)   |
| O(3)-Sm(1)-O(4)               | 52.48(14)  | O(3)-Eu(1)-O(4)               | 52.58(8)  | O(3)-Gd(1)-O(4)               | 52.85(12)  | O(3)-Tb(1)-O(4)               | 53.14(7)   |
| O(9)-Sm(1)-O(4)               | 146.59(13) | O(9)-Eu(1)-O(4)               | 146.46(8) | O(9)-Gd(1)-O(4)               | 146.34(12) | O(9)-Tb(1)-O(4)               | 146.69(7)  |
| O(6)-Sm(1)-O(4)               | 119.02(13) | O(6)-Eu(1)-O(4)               | 119.44(8) | O(6)-Gd(1)-O(4)               | 119.52(12) | O(6)-Tb(1)-O(4)               | 119.90(7)  |
| O(1) <sup>i</sup> -Sm(1)-O(1) | 69.56(15)  | O(1) <sup>i</sup> -Eu(1)-O(1) | 69.34(9)  | O(1) <sup>i</sup> -Gd(1)-O(1) | 69.05(14)  | O(1) <sup>i</sup> -Tb(1)-O(1) | 69.11(7)   |
| O(5)-Sm(1)-O(1)               | 126.24(13) | O(5)-Eu(1)-O(1)               | 126.95(8) | O(5)-Gd(1)-O(1)               | 127.03(12) | O(5)-Tb(1)-O(1)               | 126.81(6)  |
| O(2)-Sm(1)-O(1)               | 49.52(13)  | O(2)-Eu(1)-O(1)               | 49.76(8)  | O(2)-Gd(1)-O(1)               | 49.78(12)  | O(2)-Tb(1)-O(1)               | 49.32(6)   |
| O(7)-Sm(1)-O(1)               | 144.16(13) | O(7)-Eu(1)-O(1)               | 143.94(8) | O(7)-Gd(1)-O(1)               | 143.93(12) | O(7)-Tb(1)-O(1)               | 143.63(6)  |
| O(3)-Sm(1)-O(1)               | 69.72(13)  | O(3)-Eu(1)-O(1)               | 69.63(7)  | O(3)-Gd(1)-O(1)               | 69.46(11)  | O(3)-Tb(1)-O(1)               | 69.15(6)   |
| O(9)-Sm(1)-O(1)               | 74.16(13)  | O(9)-Eu(1)-O(1)               | 73.74(8)  | O(9)-Gd(1)-O(1)               | 73.55(12)  | O(9)-Tb(1)-O(1)               | 73.22(7)   |
| O(6)-Sm(1)-O(1)               | 115.64(12) | O(6)-Eu(1)-O(1)               | 115.65(8) | O(6)-Gd(1)-O(1)               | 115.84(11) | O(6)-Tb(1)-O(1)               | 115.58(6)  |
| O(4)-Sm(1)-O(1)               | 116.53(13) | O(4)-Eu(1)-O(1)               | 116.39(7) | O(4)-Gd(1)-O(1)               | 116.36(11) | O(4)-Tb(1)-O(1)               | 116.30(6)  |
| C(1)-O(1)-Sm(1)               | 85.8(4)    | C(1)-O(1)-Eu(1)               | 85.5(2)   | C(1)-O(1)-Gd(1)               | 85.4(3)    | C(1)-O(1)-Tb(1)               | 83.98(17)  |
| C(1)-O(2)-Sm(1)               | 103.3(3)   | C(1)-O(2)-Eu(1)               | 103.9(2)  | C(1)-O(2)-Gd(1)               | 104.4(3)   | C(1)-O(2)-Tb(1)               | 105.78(17) |
| C(12)-O(3)-Sm(1)              | 95.8(3)    | C(12)-O(3)-Eu(1)              | 95.32(19) | C(12)-O(3)-Gd(1)              | 95.2(3)    | C(12)-O(3)-Tb(1)              | 95.01(16)  |
| C(12)-O(4)-Sm(1)              | 90.9(3)    | C(12)-O(4)-Eu(1)              | 90.87(19) | C(12)-O(4)-Gd(1)              | 90.2(3)    | C(12)-O(4)-Tb(1)              | 89.68(16)  |
| C(23)-O(5)-Sm(1)              | 94.9(3)    | C(23)-O(5)-Eu(1)              | 95.3(2)   | C(23)-O(5)-Gd(1)              | 95.7(3)    | C(23)-O(5)-Tb(1)              | 94.91(17)  |
| C(23)-O(6)-Sm(1)              | 91.0(3)    | C(23)-O(6)-Eu(1)              | 91.1(2)   | C(23)-O(6)-Gd(1)              | 90.6(3)    | C(23)-O(6)-Tb(1)              | 90.16(17)  |
| C(34)-O(7)-Sm(1)              | 124.3(4)   | C(34)-O(7)-Eu(1)              | 124.3(2)  | C(34)-O(7)-Gd(1)              | 125.0(4)   | C(34)-O(7)-Tb(1)              | 124.62(19) |
| O(2)-C(1)-O(1)                | 121.4(6)   | O(2)-C(1)-O(1)                | 120.8(3)  | O(2)-C(1)-O(1)                | 120.5(5)   | O(2)-C(1)-O(1)                | 120.9(3)   |
| O(4)-C(12)-O(3)               | 119.9(5)   | O(4)-C(12)-O(3)               | 120.4(3)  | O(4)-C(12)-O(3)               | 120.8(4)   | O(4)-C(12)-O(3)               | 121.4(2)   |
| O(6)-C(23)-O(5)               | 121.1(5)   | O(6)-C(23)-O(5)               | 120.1(3)  | O(6)-C(23)-O(5)               | 120.3(5)   | O(6)-C(23)-O(5)               | 121.1(3)   |

Symmetry transformations used to generate equivalent atoms: i: -x,-y,-z+1

## Electronic Supplementary Information (ESI)

**Table S6.** Bond lengths (Å) and angles (°) of complexes **6** and **7**.

| <b>6</b>            |           | <b>7</b>      |           |
|---------------------|-----------|---------------|-----------|
| <i>Bond lengths</i> |           |               |           |
| O(1)-Gd(1)          | 2.404(10) | O(1)-Tb(1)    | 2.371(5)  |
| O(2)-Gd(1)          | 2.412(8)  | O(2)-Tb(1)    | 2.397(6)  |
| O(3)-Gd(1)          | 2.391(9)  | O(3)-Tb(1)    | 2.388(6)  |
| O(4)-Gd(1)          | 2.438(10) | O(8)-Tb(1)    | 2.344(5)  |
| O(5)-Gd(1)          | 2.573(11) | O(10)-Tb(1)   | 2.321(6)  |
| O(12)-Gd(1)         | 2.335(10) | O(16)-Tb(1)   | 2.619(6)  |
| O(14)-Gd(1)         | 2.356(10) | O(17)-Tb(1)   | 2.382(5)  |
| O(16)-Gd(1)         | 2.350(11) | O(19)-Tb(1)   | 2.293(5)  |
| O(1)-Gd(2)          | 2.386(11) | O(1)-Tb(2)    | 2.386(5)  |
| O(9)-Gd(2)          | 2.358(10) | O(4)-Tb(2)    | 2.392(5)  |
| O(10)-Gd(2)         | 2.365(11) | O(5)-Tb(2)    | 2.411(5)  |
| O(11)-Gd(2)         | 2.431(12) | O(8)-Tb(2)    | 2.539(5)  |
| O(15)-Gd(2)         | 2.310(11) | O(9)-Tb(2)    | 2.392(5)  |
| O(16)-Gd(2)         | 2.531(10) | O(11)-Tb(2)   | 2.308(5)  |
| O(17)-Gd(2)         | 2.441(10) | O(12)-Tb(2)   | 2.356(5)  |
| O(18)-Gd(2)         | 2.390(10) | O(15)-Tb(2)   | 2.339(5)  |
| O(1)-Gd(3)          | 2.383(9)  | O(1)-Tb(3)    | 2.376(5)  |
| O(5)-Gd(3)          | 2.330(10) | O(6)-Tb(3)    | 2.449(6)  |
| O(6)-Gd(3)          | 2.411(12) | O(7)-Tb(3)    | 2.349(6)  |
| O(7)-Gd(3)          | 2.416(9)  | O(13)-Tb(3)   | 2.306(5)  |
| O(8)-Gd(3)          | 2.304(11) | O(14)-Tb(3)   | 2.415(5)  |
| O(13)-Gd(3)         | 2.350(12) | O(15)-Tb(3)   | 2.506(5)  |
| O(18)-Gd(3)         | 2.622(12) | O(16)-Tb(3)   | 2.357(5)  |
| O(19)-Gd(3)         | 2.407(11) | O(18)-Tb(3)   | 2.372(5)  |
| O(21)-Gd(4)         | 2.358(11) | O(100)-Tb(11) | 2.378(5)  |
| O(22)-Gd(4)         | 2.401(10) | O(102)-Tb(11) | 2.377(5)  |
| O(23)-Gd(4)         | 2.410(11) | O(103)-Tb(11) | 2.387(5)  |
| O(24)-Gd(4)         | 2.427(10) | O(108)-Tb(11) | 2.294(5)  |
| O(25)-Gd(4)         | 2.525(10) | O(115)-Tb(11) | 2.367(5)  |
| O(32)-Gd(4)         | 2.324(12) | O(117)-Tb(11) | 2.362(5)  |
| O(34)-Gd(4)         | 2.356(10) | O(118)-Tb(11) | 2.508(5)  |
| O(36)-Gd(4)         | 2.379(11) | O(119)-Tb(11) | 2.407(5)  |
| O(21)-Gd(5)         | 2.385(9)  | O(100)-Tb(12) | 2.372(5)  |
| O(29)-Gd(5)         | 2.352(11) | O(106)-Tb(12) | 2.367(5)  |
| O(30)-Gd(5)         | 2.383(11) | O(107)-Tb(12) | 2.409(5)  |
| O(31)-Gd(5)         | 2.384(8)  | O(111)-Tb(12) | 2.330(5)  |
| O(35)-Gd(5)         | 2.330(10) | O(113)-Tb(12) | 2.342(5)  |
| O(36)-Gd(5)         | 2.553(11) | O(114)-Tb(12) | 2.309(5)  |
| O(37)-Gd(5)         | 2.405(11) | O(116)-Tb(12) | 2.387(5)  |
| O(38)-Gd(5)         | 2.333(10) | O(117)-Tb(12) | 2.562(5)  |
| O(21)-Gd(6)         | 2.398(9)  | O(100)-Tb(13) | 2.367(5)  |
| O(25)-Gd(6)         | 2.336(10) | O(104)-Tb(13) | 2.386(5)  |
| O(26)-Gd(6)         | 2.404(7)  | O(105)-Tb(13) | 2.411(5)  |
| O(27)-Gd(6)         | 2.396(10) | O(109)-Tb(13) | 2.382(5)  |
| O(28)-Gd(6)         | 2.336(10) | O(110)-Tb(13) | 2.312(5)  |
| O(33)-Gd(6)         | 2.426(11) | O(112)-Tb(13) | 2.388(5)  |
| O(38)-Gd(6)         | 2.587(11) | O(113)-Tb(13) | 2.543(5)  |
| O(39)-Gd(6)         | 2.425(10) | O(118)-Tb(13) | 2.339(5)  |
| C(1)-O(2)           | 1.26(2)   | C(1)-O(2)     | 1.260(11) |
| C(1)-O(3)           | 1.22(2)   | C(1)-O(3)     | 1.274(10) |
| C(12)-O(4)          | 1.303(16) | C(12)-O(4)    | 1.275(10) |
| C(12)-O(5)          | 1.273(17) | C(12)-O(5)    | 1.269(9)  |
| C(23)-O(6)          | 1.289(18) | C(23)-O(6)    | 1.254(10) |
| C(23)-O(7)          | 1.30(2)   | C(23)-O(7)    | 1.287(10) |
| C(34)-O(8)          | 1.28(2)   | C(34)-O(8)    | 1.269(9)  |
| C(34)-O(9)          | 1.26(2)   | C(34)-O(9)    | 1.255(9)  |
| C(45)-O(10)         | 1.30(2)   | C(45)-O(10)   | 1.246(10) |

## Electronic Supplementary Information (ESI)

|                    |           |                   |            |
|--------------------|-----------|-------------------|------------|
| C(45)-O(11)        | 1.229(19) | C(45)-O(11)       | 1.268(9)   |
| C(56)-O(12)        | 1.284(17) | C(56)-O(12)       | 1.252(9)   |
| C(56)-O(13)        | 1.275(18) | C(56)-O(13)       | 1.260(9)   |
| C(67)-O(14)        | 1.252(19) | C(67)-O(14)       | 1.262(9)   |
| C(67)-O(15)        | 1.24(2)   | C(67)-O(15)       | 1.277(9)   |
| C(78)-O(16)        | 1.32(2)   | C(78)-O(16)       | 1.278(9)   |
| C(78)-O(17)        | 1.288(19) | C(78)-O(17)       | 1.274(10)  |
| C(89)-O(18)        | 1.232(18) | C(89)-O(18)       | 1.245(10)  |
| C(89)-O(19)        | 1.29(2)   | C(89)-O(19)       | 1.278(10)  |
| C(101)-O(22)       | 1.25(2)   | C(101)-O(102)     | 1.265(9)   |
| C(101)-O(23)       | 1.33(2)   | C(101)-O(103)     | 1.258(10)  |
| C(112)-O(24)       | 1.288(19) | C(112)-O(104)     | 1.278(9)   |
| C(112)-O(25)       | 1.258(18) | C(112)-O(105)     | 1.263(9)   |
| C(123)-O(26)       | 1.242(19) | C(123)-O(106)     | 1.270(9)   |
| C(123)-O(27)       | 1.285(18) | C(123)-O(107)     | 1.263(10)  |
| C(134)-O(28)       | 1.235(17) | C(134)-O(108)     | 1.276(9)   |
| C(134)-O(29)       | 1.276(19) | C(134)-O(109)     | 1.254(9)   |
| C(145)-O(30)       | 1.278(18) | C(145)-O(110)     | 1.271(9)   |
| C(145)-O(31)       | 1.27(2)   | C(145)-O(111)     | 1.244(9)   |
| C(156)-O(32)       | 1.24(2)   | C(156)-O(112)     | 1.243(9)   |
| C(156)-O(33)       | 1.276(19) | C(156)-O(113)     | 1.282(8)   |
| C(167)-O(34)       | 1.266(18) | C(167)-O(114)     | 1.273(9)   |
| C(167)-O(35)       | 1.259(19) | C(167)-O(115)     | 1.257(9)   |
| C(178)-O(36)       | 1.27(2)   | C(178)-O(116)     | 1.244(9)   |
| C(178)-O(37)       | 1.27(2)   | C(178)-O(117)     | 1.271(9)   |
| C(189)-O(38)       | 1.262(17) | C(189)-O(118)     | 1.293(9)   |
| C(189)-O(39)       | 1.270(18) | C(189)-O(119)     | 1.254(9)   |
| <i>Bond angles</i> |           |                   |            |
| O(3)-Gd(1)-O(1)    | 150.4(4)  | O(1)-Tb(1)-O(3)   | 145.23(18) |
| O(12)-Gd(1)-O(2)   | 132.9(4)  | O(19)-Tb(1)-O(10) | 102.1(2)   |
| O(16)-Gd(1)-O(2)   | 79.8(4)   | O(19)-Tb(1)-O(8)  | 146.3(2)   |
| O(14)-Gd(1)-O(2)   | 82.3(4)   | O(10)-Tb(1)-O(8)  | 88.40(19)  |
| O(3)-Gd(1)-O(2)    | 53.8(4)   | O(19)-Tb(1)-O(1)  | 78.65(18)  |
| O(1)-Gd(1)-O(2)    | 141.0(4)  | O(10)-Tb(1)-O(1)  | 74.43(18)  |
| O(12)-Gd(1)-O(4)   | 93.0(4)   | O(19)-Tb(1)-O(17) | 90.2(2)    |
| O(16)-Gd(1)-O(4)   | 85.9(4)   | O(10)-Tb(1)-O(17) | 161.6(2)   |
| O(14)-Gd(1)-O(4)   | 163.0(3)  | O(8)-Tb(1)-O(17)  | 88.77(19)  |
| O(3)-Gd(1)-O(4)    | 81.3(4)   | O(1)-Tb(1)-O(17)  | 121.99(18) |
| O(1)-Gd(1)-O(4)    | 121.5(3)  | O(19)-Tb(1)-O(3)  | 130.9(2)   |
| O(2)-Gd(1)-O(4)    | 81.1(4)   | O(10)-Tb(1)-O(3)  | 80.7(2)    |
| O(12)-Gd(1)-O(5)   | 76.4(4)   | O(8)-Tb(1)-O(3)   | 82.10(18)  |
| O(16)-Gd(1)-O(5)   | 76.5(3)   | O(8)-Tb(1)-O(1)   | 73.45(17)  |
| O(14)-Gd(1)-O(5)   | 143.6(3)  | O(17)-Tb(1)-O(3)  | 80.9(2)    |
| O(3)-Gd(1)-O(5)    | 125.9(4)  | O(19)-Tb(1)-O(2)  | 76.7(2)    |
| O(1)-Gd(1)-O(5)    | 69.1(3)   | O(10)-Tb(1)-O(2)  | 81.2(2)    |
| O(2)-Gd(1)-O(5)    | 129.2(4)  | O(8)-Tb(1)-O(2)   | 137.0(2)   |
| O(4)-Gd(1)-O(5)    | 53.1(3)   | O(1)-Tb(1)-O(2)   | 140.52(18) |
| O(12)-Gd(1)-O(16)  | 146.8(4)  | O(17)-Tb(1)-O(2)  | 88.5(2)    |
| O(12)-Gd(1)-O(14)  | 95.3(4)   | O(3)-Tb(1)-O(2)   | 55.1(2)    |
| O(16)-Gd(1)-O(14)  | 95.1(4)   | O(19)-Tb(1)-O(16) | 73.08(19)  |
| O(12)-Gd(1)-O(3)   | 79.1(4)   | O(10)-Tb(1)-O(16) | 144.42(18) |
| O(16)-Gd(1)-O(3)   | 133.2(4)  | O(8)-Tb(1)-O(16)  | 79.77(18)  |
| O(14)-Gd(1)-O(3)   | 85.7(4)   | O(1)-Tb(1)-O(16)  | 70.05(16)  |
| O(12)-Gd(1)-O(1)   | 81.0(4)   | O(17)-Tb(1)-O(16) | 52.38(18)  |
| O(16)-Gd(1)-O(1)   | 71.6(3)   | O(3)-Tb(1)-O(16)  | 129.75(18) |
| O(14)-Gd(1)-O(1)   | 74.6(3)   | O(2)-Tb(1)-O(16)  | 129.18(19) |
| O(15)-Gd(2)-O(9)   | 97.8(4)   | O(11)-Tb(2)-O(15) | 146.44(19) |
| O(15)-Gd(2)-O(10)  | 133.7(4)  | O(11)-Tb(2)-O(12) | 95.23(19)  |
| O(9)-Gd(2)-O(10)   | 80.1(4)   | O(15)-Tb(2)-O(12) | 95.20(18)  |
| O(15)-Gd(2)-O(18)  | 146.8(4)  | O(11)-Tb(2)-O(1)  | 80.98(18)  |
| O(9)-Gd(2)-O(18)   | 92.3(4)   | O(15)-Tb(2)-O(1)  | 71.32(17)  |

## Electronic Supplementary Information (ESI)

|                   |          |                      |            |
|-------------------|----------|----------------------|------------|
| O(10)-Gd(2)-O(18) | 79.1(4)  | O(12)-Tb(2)-O(1)     | 74.43(17)  |
| O(15)-Gd(2)-O(1)  | 77.4(4)  | O(11)-Tb(2)-O(4)     | 78.84(19)  |
| O(9)-Gd(2)-O(1)   | 75.4(4)  | O(15)-Tb(2)-O(4)     | 133.72(19) |
| O(10)-Gd(2)-O(1)  | 143.1(4) | O(12)-Tb(2)-O(4)     | 85.86(17)  |
| O(1)-Gd(2)-O(18)  | 74.7(4)  | O(1)-Tb(2)-O(4)      | 150.24(17) |
| O(15)-Gd(2)-O(11) | 79.8(4)  | O(11)-Tb(2)-O(9)     | 92.19(18)  |
| O(9)-Gd(2)-O(11)  | 84.8(4)  | O(15)-Tb(2)-O(9)     | 86.69(18)  |
| O(10)-Gd(2)-O(11) | 54.0(4)  | O(12)-Tb(2)-O(9)     | 163.33(18) |
| O(18)-Gd(2)-O(11) | 132.9(4) | O(1)-Tb(2)-O(9)      | 121.58(17) |
| O(1)-Gd(2)-O(11)  | 147.2(4) | O(4)-Tb(2)-O(9)      | 80.96(18)  |
| O(15)-Gd(2)-O(17) | 91.2(4)  | O(11)-Tb(2)-O(5)     | 133.71(19) |
| O(9)-Gd(2)-O(17)  | 161.8(4) | O(15)-Tb(2)-O(5)     | 79.33(18)  |
| O(10)-Gd(2)-O(17) | 82.2(4)  | O(12)-Tb(2)-O(5)     | 82.43(18)  |
| O(18)-Gd(2)-O(17) | 88.7(4)  | O(1)-Tb(2)-O(5)      | 140.30(18) |
| O(1)-Gd(2)-O(17)  | 122.3(4) | O(4)-Tb(2)-O(5)      | 54.87(19)  |
| O(11)-Gd(2)-O(17) | 81.2(4)  | O(9)-Tb(2)-O(5)      | 81.65(17)  |
| O(15)-Gd(2)-O(16) | 76.9(4)  | O(11)-Tb(2)-O(8)     | 75.84(18)  |
| O(9)-Gd(2)-O(16)  | 144.2(4) | O(15)-Tb(2)-O(8)     | 77.02(18)  |
| O(10)-Gd(2)-O(16) | 129.0(4) | O(12)-Tb(2)-O(8)     | 144.01(17) |
| O(18)-Gd(2)-O(16) | 76.5(3)  | O(1)-Tb(2)-O(8)      | 69.77(16)  |
| O(1)-Gd(2)-O(16)  | 68.8(3)  | O(4)-Tb(2)-O(8)      | 124.96(17) |
| O(11)-Gd(2)-O(16) | 127.7(3) | O(9)-Tb(2)-O(8)      | 52.50(17)  |
| O(17)-Gd(2)-O(16) | 53.5(4)  | O(5)-Tb(2)-O(8)      | 128.90(16) |
| O(8)-Gd(3)-O(5)   | 146.9(4) | O(13)-Tb(3)-O(7)     | 133.36(19) |
| O(8)-Gd(3)-O(13)  | 102.1(4) | O(13)-Tb(3)-O(16)    | 147.30(19) |
| O(5)-Gd(3)-O(13)  | 89.1(4)  | O(7)-Tb(3)-O(16)     | 79.13(19)  |
| O(8)-Gd(3)-O(1)   | 79.4(4)  | O(13)-Tb(3)-O(18)    | 96.27(18)  |
| O(5)-Gd(3)-O(1)   | 73.7(4)  | O(7)-Tb(3)-O(18)     | 79.95(19)  |
| O(13)-Gd(3)-O(1)  | 74.8(4)  | O(16)-Tb(3)-O(18)    | 92.95(19)  |
| O(8)-Gd(3)-O(6)   | 131.4(4) | O(13)-Tb(3)-O(1)     | 77.40(18)  |
| O(5)-Gd(3)-O(6)   | 80.7(4)  | O(7)-Tb(3)-O(1)      | 142.79(19) |
| O(13)-Gd(3)-O(6)  | 80.9(5)  | O(16)-Tb(3)-O(1)     | 74.68(17)  |
| O(1)-Gd(3)-O(6)   | 144.6(4) | O(18)-Tb(3)-O(1)     | 75.52(18)  |
| O(8)-Gd(3)-O(19)  | 90.3(4)  | O(13)-Tb(3)-O(14)    | 92.28(18)  |
| O(5)-Gd(3)-O(19)  | 87.8(4)  | O(7)-Tb(3)-O(14)     | 83.21(19)  |
| O(13)-Gd(3)-O(19) | 161.4(4) | O(16)-Tb(3)-O(14)    | 87.86(19)  |
| O(1)-Gd(3)-O(19)  | 121.6(4) | O(18)-Tb(3)-O(14)    | 162.67(19) |
| O(19)-Gd(3)-O(6)  | 80.5(4)  | O(1)-Tb(3)-O(14)     | 121.20(17) |
| O(8)-Gd(3)-O(7)   | 76.9(4)  | O(13)-Tb(3)-O(6)     | 78.73(19)  |
| O(5)-Gd(3)-O(7)   | 135.9(4) | O(7)-Tb(3)-O(6)      | 54.67(19)  |
| O(13)-Gd(3)-O(7)  | 81.2(4)  | O(16)-Tb(3)-O(6)     | 133.36(19) |
| O(1)-Gd(3)-O(7)   | 141.7(4) | O(18)-Tb(3)-O(6)     | 85.63(19)  |
| O(6)-Gd(3)-O(7)   | 55.4(4)  | O(1)-Tb(3)-O(6)      | 147.56(17) |
| O(19)-Gd(3)-O(7)  | 88.2(4)  | O(14)-Tb(3)-O(6)     | 81.29(18)  |
| O(8)-Gd(3)-O(18)  | 73.2(4)  | O(13)-Tb(3)-O(15)    | 78.01(17)  |
| O(5)-Gd(3)-O(18)  | 80.0(4)  | O(7)-Tb(3)-O(15)     | 129.42(18) |
| O(13)-Gd(3)-O(18) | 145.4(4) | O(16)-Tb(3)-O(15)    | 76.22(18)  |
| O(1)-Gd(3)-O(18)  | 70.6(3)  | O(18)-Tb(3)-O(15)    | 144.11(18) |
| O(6)-Gd(3)-O(18)  | 128.6(4) | O(1)-Tb(3)-O(15)     | 68.64(16)  |
| O(19)-Gd(3)-O(18) | 51.7(3)  | O(14)-Tb(3)-O(15)    | 52.64(17)  |
| O(7)-Gd(3)-O(18)  | 128.6(4) | O(6)-Tb(3)-O(15)     | 126.66(18) |
| O(32)-Gd(4)-O(34) | 103.3(4) | O(108)-Tb(11)-O(117) | 144.91(19) |
| O(32)-Gd(4)-O(21) | 75.2(4)  | O(108)-Tb(11)-O(115) | 100.33(18) |
| O(34)-Gd(4)-O(21) | 74.8(4)  | O(117)-Tb(11)-O(115) | 89.66(17)  |
| O(32)-Gd(4)-O(36) | 142.3(4) | O(108)-Tb(11)-O(102) | 132.62(19) |
| O(34)-Gd(4)-O(36) | 88.6(4)  | O(117)-Tb(11)-O(102) | 82.15(18)  |
| O(21)-Gd(4)-O(36) | 73.6(4)  | O(115)-Tb(11)-O(102) | 79.24(18)  |
| O(32)-Gd(4)-O(22) | 134.6(5) | O(108)-Tb(11)-O(100) | 76.23(18)  |
| O(34)-Gd(4)-O(22) | 78.3(4)  | O(117)-Tb(11)-O(100) | 74.04(17)  |
| O(21)-Gd(4)-O(22) | 144.2(4) | O(115)-Tb(11)-O(100) | 75.07(17)  |
| O(36)-Gd(4)-O(22) | 82.6(4)  | O(102)-Tb(11)-O(100) | 144.74(18) |



## Electronic Supplementary Information (ESI)

|                   |          |                      |            |
|-------------------|----------|----------------------|------------|
| O(32)-Gd(4)-O(23) | 79.1(5)  | O(108)-Tb(11)-O(103) | 77.7(2)    |
| O(34)-Gd(4)-O(23) | 84.4(4)  | O(117)-Tb(11)-O(103) | 137.07(19) |
| O(21)-Gd(4)-O(23) | 141.9(4) | O(115)-Tb(11)-O(103) | 84.38(18)  |
| O(36)-Gd(4)-O(23) | 138.2(4) | O(102)-Tb(11)-O(103) | 54.95(19)  |
| O(22)-Gd(4)-O(23) | 55.7(4)  | O(100)-Tb(11)-O(103) | 143.05(17) |
| O(32)-Gd(4)-O(24) | 90.5(4)  | O(108)-Tb(11)-O(119) | 92.14(18)  |
| O(34)-Gd(4)-O(24) | 160.3(4) | O(117)-Tb(11)-O(119) | 88.33(18)  |
| O(21)-Gd(4)-O(24) | 123.0(4) | O(115)-Tb(11)-O(119) | 160.87(18) |
| O(36)-Gd(4)-O(24) | 88.9(4)  | O(102)-Tb(11)-O(119) | 81.64(18)  |
| O(22)-Gd(4)-O(24) | 81.9(4)  | O(100)-Tb(11)-O(119) | 122.41(16) |
| O(23)-Gd(4)-O(24) | 84.5(4)  | O(103)-Tb(11)-O(119) | 84.17(18)  |
| O(32)-Gd(4)-O(25) | 73.1(4)  | O(108)-Tb(11)-O(118) | 75.64(18)  |
| O(34)-Gd(4)-O(25) | 143.7(4) | O(117)-Tb(11)-O(118) | 76.80(17)  |
| O(21)-Gd(4)-O(25) | 69.3(3)  | O(115)-Tb(11)-O(118) | 144.30(17) |
| O(36)-Gd(4)-O(25) | 76.3(3)  | O(102)-Tb(11)-O(118) | 129.84(17) |
| O(22)-Gd(4)-O(25) | 130.5(4) | O(100)-Tb(11)-O(118) | 69.49(16)  |
| O(23)-Gd(4)-O(25) | 128.3(3) | O(103)-Tb(11)-O(118) | 127.64(18) |
| O(24)-Gd(4)-O(25) | 53.8(3)  | O(119)-Tb(11)-O(118) | 53.07(16)  |
| O(35)-Gd(5)-O(38) | 148.1(4) | O(114)-Tb(12)-O(111) | 100.21(19) |
| O(35)-Gd(5)-O(29) | 100.7(4) | O(114)-Tb(12)-O(113) | 147.19(18) |
| O(38)-Gd(5)-O(29) | 88.0(4)  | O(111)-Tb(12)-O(113) | 88.59(18)  |
| O(35)-Gd(5)-O(30) | 130.7(4) | O(114)-Tb(12)-O(106) | 131.44(18) |
| O(38)-Gd(5)-O(30) | 80.7(4)  | O(111)-Tb(12)-O(106) | 80.95(19)  |
| O(29)-Gd(5)-O(30) | 81.3(4)  | O(113)-Tb(12)-O(106) | 80.98(17)  |
| O(35)-Gd(5)-O(31) | 75.7(4)  | O(114)-Tb(12)-O(100) | 79.60(17)  |
| O(38)-Gd(5)-O(31) | 136.1(4) | O(111)-Tb(12)-O(100) | 74.19(18)  |
| O(29)-Gd(5)-O(31) | 82.5(4)  | O(113)-Tb(12)-O(100) | 72.47(16)  |
| O(31)-Gd(5)-O(30) | 55.5(4)  | O(106)-Tb(12)-O(100) | 143.68(18) |
| O(35)-Gd(5)-O(21) | 79.5(4)  | O(114)-Tb(12)-O(116) | 90.55(18)  |
| O(38)-Gd(5)-O(21) | 73.3(3)  | O(111)-Tb(12)-O(116) | 162.09(19) |
| O(29)-Gd(5)-O(21) | 74.9(4)  | O(113)-Tb(12)-O(116) | 90.03(18)  |
| O(30)-Gd(5)-O(21) | 144.9(4) | O(106)-Tb(12)-O(116) | 81.20(19)  |
| O(31)-Gd(5)-O(21) | 142.5(4) | O(100)-Tb(12)-O(116) | 122.24(18) |
| O(35)-Gd(5)-O(37) | 90.8(4)  | O(114)-Tb(12)-O(107) | 77.01(19)  |
| O(38)-Gd(5)-O(37) | 89.4(4)  | O(111)-Tb(12)-O(107) | 82.42(19)  |
| O(29)-Gd(5)-O(37) | 162.0(4) | O(113)-Tb(12)-O(107) | 135.73(18) |
| O(30)-Gd(5)-O(37) | 80.8(4)  | O(106)-Tb(12)-O(107) | 54.83(19)  |
| O(31)-Gd(5)-O(37) | 87.1(4)  | O(100)-Tb(12)-O(107) | 143.18(18) |
| O(21)-Gd(5)-O(37) | 121.2(4) | O(116)-Tb(12)-O(107) | 86.15(19)  |
| O(35)-Gd(5)-O(36) | 74.3(4)  | O(114)-Tb(12)-O(117) | 73.97(17)  |
| O(38)-Gd(5)-O(36) | 81.0(3)  | O(111)-Tb(12)-O(117) | 144.73(17) |
| O(29)-Gd(5)-O(36) | 144.9(3) | O(113)-Tb(12)-O(117) | 80.65(16)  |
| O(30)-Gd(5)-O(36) | 128.8(4) | O(106)-Tb(12)-O(117) | 129.42(17) |
| O(31)-Gd(5)-O(36) | 127.5(4) | O(100)-Tb(12)-O(117) | 70.54(16)  |
| O(21)-Gd(5)-O(36) | 70.1(4)  | O(116)-Tb(12)-O(117) | 52.19(17)  |
| O(37)-Gd(5)-O(36) | 51.6(4)  | O(107)-Tb(12)-O(117) | 127.78(18) |
| O(28)-Gd(6)-O(25) | 144.5(4) | O(110)-Tb(13)-O(118) | 144.80(18) |
| O(25)-Gd(6)-O(27) | 132.6(3) | O(110)-Tb(13)-O(100) | 79.62(17)  |
| O(28)-Gd(6)-O(27) | 80.5(4)  | O(118)-Tb(13)-O(100) | 72.61(16)  |
| O(25)-Gd(6)-O(21) | 71.9(4)  | O(110)-Tb(13)-O(109) | 92.63(19)  |
| O(28)-Gd(6)-O(21) | 80.5(4)  | O(118)-Tb(13)-O(109) | 101.10(18) |
| O(27)-Gd(6)-O(21) | 152.2(4) | O(100)-Tb(13)-O(109) | 76.18(17)  |
| O(25)-Gd(6)-O(26) | 79.2(3)  | O(110)-Tb(13)-O(104) | 135.67(18) |
| O(28)-Gd(6)-O(26) | 135.2(4) | O(118)-Tb(13)-O(104) | 78.61(17)  |
| O(27)-Gd(6)-O(26) | 54.6(3)  | O(100)-Tb(13)-O(104) | 140.01(17) |
| O(21)-Gd(6)-O(26) | 140.1(3) | O(109)-Tb(13)-O(104) | 82.92(17)  |
| O(25)-Gd(6)-O(33) | 103.0(4) | O(110)-Tb(13)-O(112) | 90.70(17)  |
| O(28)-Gd(6)-O(33) | 91.5(4)  | O(118)-Tb(13)-O(112) | 85.83(17)  |
| O(27)-Gd(6)-O(33) | 84.0(4)  | O(100)-Tb(13)-O(112) | 121.43(16) |
| O(21)-Gd(6)-O(33) | 76.4(3)  | O(109)-Tb(13)-O(112) | 162.39(17) |
| O(26)-Gd(6)-O(33) | 84.2(3)  | O(104)-Tb(13)-O(112) | 82.62(17)  |

## Electronic Supplementary Information (ESI)

|                    |           |                      |            |
|--------------------|-----------|----------------------|------------|
| O(25)-Gd(6)-O(39)  | 85.0(4)   | O(110)-Tb(13)-O(105) | 80.81(18)  |
| O(28)-Gd(6)-O(39)  | 90.6(4)   | O(118)-Tb(13)-O(105) | 132.46(17) |
| O(27)-Gd(6)-O(39)  | 79.3(4)   | O(100)-Tb(13)-O(105) | 151.19(17) |
| O(21)-Gd(6)-O(39)  | 121.0(3)  | O(109)-Tb(13)-O(105) | 83.84(17)  |
| O(26)-Gd(6)-O(39)  | 82.1(3)   | O(104)-Tb(13)-O(105) | 54.87(18)  |
| O(39)-Gd(6)-O(33)  | 162.6(4)  | O(112)-Tb(13)-O(105) | 79.63(17)  |
| O(25)-Gd(6)-O(38)  | 74.1(3)   | O(110)-Tb(13)-O(113) | 75.23(17)  |
| O(28)-Gd(6)-O(38)  | 75.3(4)   | O(118)-Tb(13)-O(113) | 74.90(17)  |
| O(27)-Gd(6)-O(38)  | 125.0(3)  | O(100)-Tb(13)-O(113) | 69.06(15)  |
| O(21)-Gd(6)-O(38)  | 68.7(3)   | O(109)-Tb(13)-O(113) | 144.63(16) |
| O(26)-Gd(6)-O(38)  | 128.5(3)  | O(104)-Tb(13)-O(113) | 128.81(16) |
| O(33)-Gd(6)-O(38)  | 144.1(3)  | O(112)-Tb(13)-O(113) | 52.73(16)  |
| O(39)-Gd(6)-O(38)  | 52.8(3)   | O(105)-Tb(13)-O(113) | 125.27(16) |
| C(1)-O(2)-Gd(1)    | 90.0(10)  | C(1)-O(2)-Tb(1)      | 91.3(5)    |
| C(1)-O(3)-Gd(1)    | 92.0(10)  | C(1)-O(3)-Tb(1)      | 91.4(5)    |
| C(12)-O(4)-Gd(1)   | 95.6(9)   | C(34)-O(8)-Tb(1)     | 164.0(5)   |
| C(12)-O(5)-Gd(1)   | 90.2(8)   | C(45)-O(10)-Tb(1)    | 131.6(5)   |
| C(56)-O(12)-Gd(1)  | 137.9(11) | C(78)-O(16)-Tb(1)    | 87.5(5)    |
| C(67)-O(14)-Gd(1)  | 127.2(11) | C(78)-O(17)-Tb(1)    | 98.6(4)    |
| C(78)-O(16)-Gd(1)  | 155.2(10) | C(89)-O(19)-Tb(1)    | 142.5(5)   |
| C(34)-O(9)-Gd(2)   | 125.5(11) | C(12)-O(4)-Tb(2)     | 92.0(4)    |
| C(45)-O(10)-Gd(2)  | 94.1(10)  | C(12)-O(5)-Tb(2)     | 91.3(4)    |
| C(45)-O(11)-Gd(2)  | 92.9(11)  | C(34)-O(8)-Tb(2)     | 90.1(4)    |
| C(67)-O(15)-Gd(2)  | 139.8(11) | C(34)-O(9)-Tb(2)     | 97.4(4)    |
| C(78)-O(16)-Gd(2)  | 91.5(9)   | C(45)-O(11)-Tb(2)    | 138.1(5)   |
| C(78)-O(17)-Gd(2)  | 96.3(10)  | C(56)-O(12)-Tb(2)    | 127.6(5)   |
| C(89)-O(18)-Gd(2)  | 164.5(13) | C(67)-O(15)-Tb(2)    | 157.2(5)   |
| C(12)-O(5)-Gd(3)   | 163.6(10) | C(23)-O(6)-Tb(3)     | 90.4(5)    |
| C(23)-O(6)-Gd(3)   | 92.1(11)  | C(23)-O(7)-Tb(3)     | 94.2(5)    |
| C(23)-O(7)-Gd(3)   | 91.6(9)   | C(56)-O(13)-Tb(3)    | 139.8(5)   |
| C(34)-O(8)-Gd(3)   | 140.2(11) | C(67)-O(14)-Tb(3)    | 96.7(5)    |
| C(56)-O(13)-Gd(3)  | 132.0(10) | C(67)-O(15)-Tb(3)    | 92.0(4)    |
| C(89)-O(18)-Gd(3)  | 89.0(11)  | C(78)-O(16)-Tb(3)    | 163.6(5)   |
| C(89)-O(19)-Gd(3)  | 97.5(9)   | C(89)-O(18)-Tb(3)    | 126.1(5)   |
| C(101)-O(22)-Gd(4) | 92.1(11)  | C(101)-O(102)-Tb(11) | 91.9(4)    |
| C(101)-O(23)-Gd(4) | 89.8(11)  | C(101)-O(103)-Tb(11) | 91.6(4)    |
| C(112)-O(24)-Gd(4) | 93.3(9)   | C(134)-O(108)-Tb(11) | 143.2(5)   |
| C(112)-O(25)-Gd(4) | 89.6(9)   | C(167)-O(115)-Tb(11) | 128.6(4)   |
| C(156)-O(32)-Gd(4) | 144.3(11) | C(178)-O(117)-Tb(11) | 164.1(5)   |
| C(167)-O(34)-Gd(4) | 130.1(10) | C(189)-O(118)-Tb(11) | 91.0(4)    |
| C(178)-O(36)-Gd(4) | 162.2(13) | C(189)-O(119)-Tb(11) | 96.7(4)    |
| C(134)-O(29)-Gd(5) | 131.6(10) | C(123)-O(106)-Tb(12) | 93.0(5)    |
| C(145)-O(30)-Gd(5) | 91.4(11)  | C(123)-O(107)-Tb(12) | 91.2(4)    |
| C(145)-O(31)-Gd(5) | 91.5(8)   | C(145)-O(111)-Tb(12) | 131.5(5)   |
| C(167)-O(35)-Gd(5) | 138.4(10) | C(156)-O(113)-Tb(12) | 163.6(5)   |
| C(178)-O(36)-Gd(5) | 92.3(11)  | C(167)-O(114)-Tb(12) | 140.3(5)   |
| C(178)-O(37)-Gd(5) | 99.4(11)  | C(178)-O(116)-Tb(12) | 97.8(4)    |
| C(189)-O(38)-Gd(5) | 164.1(10) | C(178)-O(117)-Tb(12) | 88.9(4)    |
| C(112)-O(25)-Gd(6) | 157.2(10) | C(112)-O(104)-Tb(13) | 91.9(4)    |
| C(123)-O(26)-Gd(6) | 92.0(8)   | C(112)-O(105)-Tb(13) | 91.2(4)    |
| C(123)-O(27)-Gd(6) | 91.4(9)   | C(134)-O(109)-Tb(13) | 119.9(5)   |
| C(134)-O(28)-Gd(6) | 138.7(12) | C(145)-O(110)-Tb(13) | 139.2(5)   |
| C(156)-O(33)-Gd(6) | 115.4(11) | C(156)-O(112)-Tb(13) | 97.4(4)    |
| C(189)-O(38)-Gd(6) | 88.0(9)   | C(156)-O(113)-Tb(13) | 89.2(4)    |
| C(189)-O(39)-Gd(6) | 95.2(9)   | C(189)-O(118)-Tb(13) | 158.1(5)   |
| O(3)-C(1)-O(2)     | 123.0(15) | O(2)-C(1)-O(3)       | 121.8(8)   |
| O(5)-C(12)-O(4)    | 121.1(14) | O(5)-C(12)-O(4)      | 120.8(7)   |
| O(6)-C(23)-O(7)    | 120.1(16) | O(6)-C(23)-O(7)      | 120.3(7)   |
| O(9)-C(34)-O(8)    | 126.9(15) | O(9)-C(34)-O(8)      | 119.9(6)   |
| O(11)-C(45)-O(10)  | 118.7(17) | O(10)-C(45)-O(11)    | 125.2(7)   |
| O(13)-C(56)-O(12)  | 125.1(16) | O(12)-C(56)-O(13)    | 125.5(7)   |

## Electronic Supplementary Information (ESI)

|                    |           |                      |          |
|--------------------|-----------|----------------------|----------|
| O(15)-C(67)-O(14)  | 125.2(16) | O(14)-C(67)-O(15)    | 118.6(7) |
| O(17)-C(78)-O(16)  | 118.6(14) | O(17)-C(78)-O(16)    | 120.6(7) |
| O(18)-C(89)-O(19)  | 121.1(17) | O(18)-C(89)-O(19)    | 124.3(7) |
| O(22)-C(101)-O(23) | 121.6(17) | O(103)-C(101)-O(102) | 121.2(7) |
| O(25)-C(112)-O(24) | 123.3(15) | O(105)-C(112)-O(104) | 120.9(6) |
| O(26)-C(123)-O(27) | 121.3(13) | O(107)-C(123)-O(106) | 120.5(7) |
| O(28)-C(134)-O(29) | 126.1(17) | O(109)-C(134)-O(108) | 124.2(7) |
| O(31)-C(145)-O(30) | 121.2(15) | O(111)-C(145)-O(110) | 125.2(7) |
| O(32)-C(156)-O(33) | 123.5(16) | O(112)-C(156)-O(113) | 120.6(6) |
| O(35)-C(167)-O(34) | 126.0(14) | O(115)-C(167)-O(114) | 125.3(6) |
| O(36)-C(178)-O(37) | 116.4(18) | O(116)-C(178)-O(117) | 120.4(7) |
| O(38)-C(189)-O(39) | 123.8(15) | O(119)-C(189)-O(118) | 119.3(6) |

---

## 3- Electrochemistry

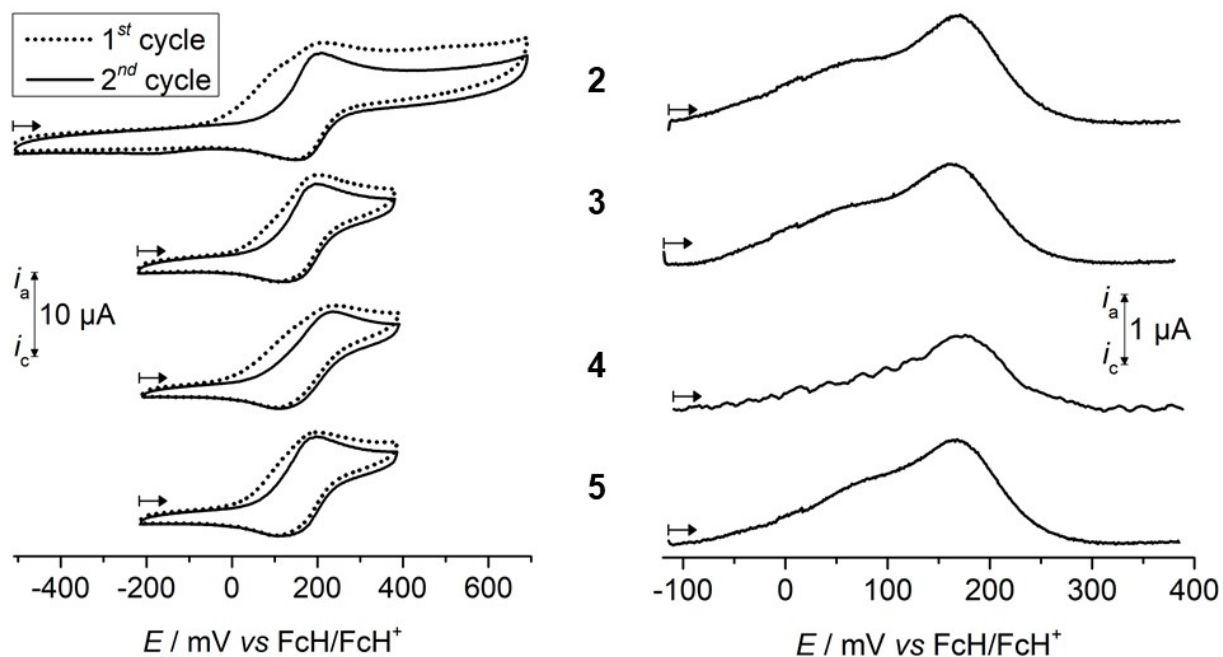

**Figure S10.** Cyclic voltammograms (scan rate  $100 \text{ mV}\cdot\text{s}^{-1}$ ; left) and respective square wave voltammograms (duration: 1 s, amplitude: 5 mV, pulse: 25 mV; right) of **2** – **5**; The experiments were performed in a dimethylformamide solution of analyte ( $0.25 \text{ mmol}\cdot\text{L}^{-1}$ ) at  $25 \text{ }^\circ\text{C}$  using  $0.1 \text{ mol}\cdot\text{L}^{-1}$   $[\text{Bu}_4\text{N}][\text{ClO}_4]$  as supporting electrolyte and potentials given vs ferrocene/ferrocenium.

**Table S7.** Cyclic voltammetry data of **2** – **5**.<sup>a)</sup>

| Compound | $E_{\text{pc}} / \text{mV}^{\text{b)}$ | $E^{\circ\prime} / \text{mV}^{\text{c)}$ ( $\Delta E_{\text{p}} / \text{mV}^{\text{d)}$ |
|----------|----------------------------------------|-----------------------------------------------------------------------------------------|
| <b>2</b> | -210                                   | 180 (80)                                                                                |
| <b>3</b> | -260                                   | 185 (81)                                                                                |
| <b>4</b> | -260                                   | 185 (80)                                                                                |
| <b>5</b> | -210                                   | 175 (78)                                                                                |

a) Potentials vs FcH/FcH<sup>+</sup> (scan rate  $100 \text{ mV}\cdot\text{s}^{-1}$ ) at a glassy carbon electrode of  $0.25 \text{ mmol}\cdot\text{L}^{-1}$  solutions of analyte in dimethylformamide containing  $0.1 \text{ mol}\cdot\text{L}^{-1}$  of  $[\text{Bu}_4\text{N}][\text{ClO}_4]$  as supporting electrolyte at  $25 \text{ }^\circ\text{C}$ . b)  $E_{\text{pc}}$  irreversible process. c)  $E^{\circ\prime}$  = formal potential. d)  $\Delta E_{\text{p}}$  = difference between the cathodic and anodic peak potentials  $|E_{\text{pc}} - E_{\text{pa}}|$ .

## Electronic Supplementary Information (ESI)

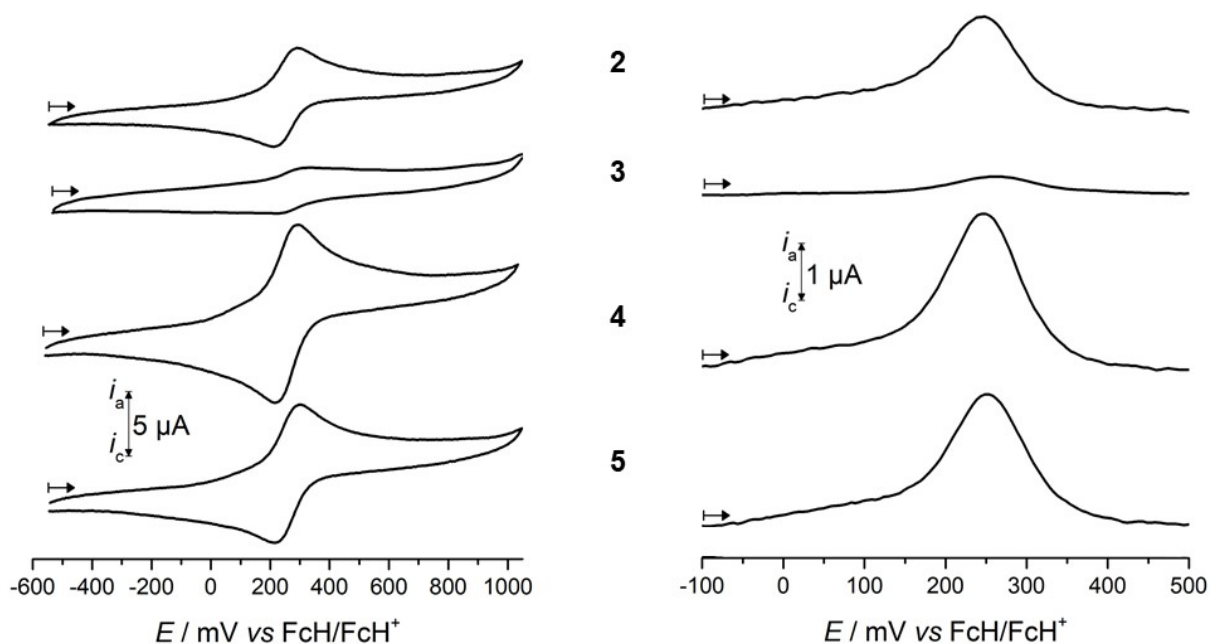

**Figure S11.** Cyclic voltammograms (scan rate 100  $\text{mV}\cdot\text{s}^{-1}$ ; left) and respective square wave voltammograms (duration: 1 s, amplitude: 5 mV, pulse: 25 mV; right) of **2** – **5**; The experiments were performed in a  $\text{CH}_2\text{Cl}_2$  solution of conc. analyte ( $< 0.25 \text{ mmol}\cdot\text{L}^{-1}$ ) at 25  $^\circ\text{C}$  using  $0.1 \text{ mol}\cdot\text{L}^{-1}$   $[\text{Bu}_4\text{N}][\text{B}(\text{C}_6\text{F}_5)_4]$  as supporting electrolyte and potentials given vs ferrocene/ferrocenium.

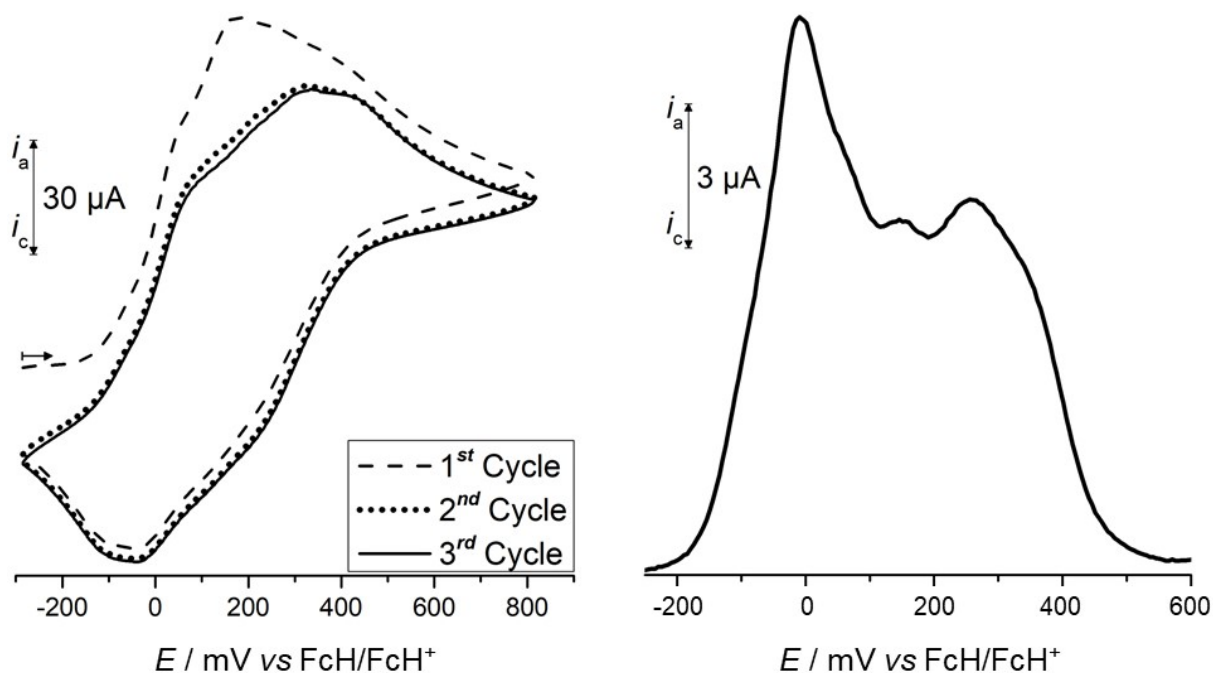

**Figure S12.** Cyclic voltammogram (left) and the respective square wave voltammogram (duration: 1 s, amplitude: 5 mV, pulse: 25 mV) (right) of **7**; Both experiments were performed in a  $\text{CH}_2\text{Cl}_2$  solution of analyte ( $1.0 \text{ mmol}\cdot\text{L}^{-1}$ ) at 25  $^\circ\text{C}$  using  $0.1 \text{ mol}\cdot\text{L}^{-1}$   $[\text{Bu}_4\text{N}][\text{B}(\text{C}_6\text{F}_5)_4]$  as supporting electrolyte and potentials given vs ferrocene/ferrocenium.

## Electronic Supplementary Information (ESI)

### 4- Computational Chemistry

**Table S8.** Effective ion radii (pm) of **Gd** and **Tb** compared with **Y** and **La** for various coordination numbers.<sup>1</sup>

| Coordination number | r <b>Y</b> / pm | $\Delta r$ / pm | r <b>Gd</b> / pm | $\Delta r$ / pm | r <b>La</b> / pm |
|---------------------|-----------------|-----------------|------------------|-----------------|------------------|
| 6                   | 104             | 3.8             | 107.8            | 9.4             | 117.2            |
| 7                   | 110             | 4               | 114              | 10              | 124              |
| 8                   | 115.9           | 3.4             | 119.3            | 10.7            | 130              |
| 9                   | 121.5           | 3.2             | 124.7            | 10.9            | 135.6            |
|                     | r <b>Y</b> / pm |                 | r <b>Tb</b> / pm |                 | r <b>La</b> / pm |
| 6                   | 104             | 2.3             | 106.3            | 10.9            | 117.2            |
| 7                   | 110             | 2               | 112              | 12              | 124              |
| 8                   | 115.9           | 2.1             | 118              | 12              | 130              |
| 9                   | 121.5           | 2               | 123.5            | 12.1            | 135.6            |

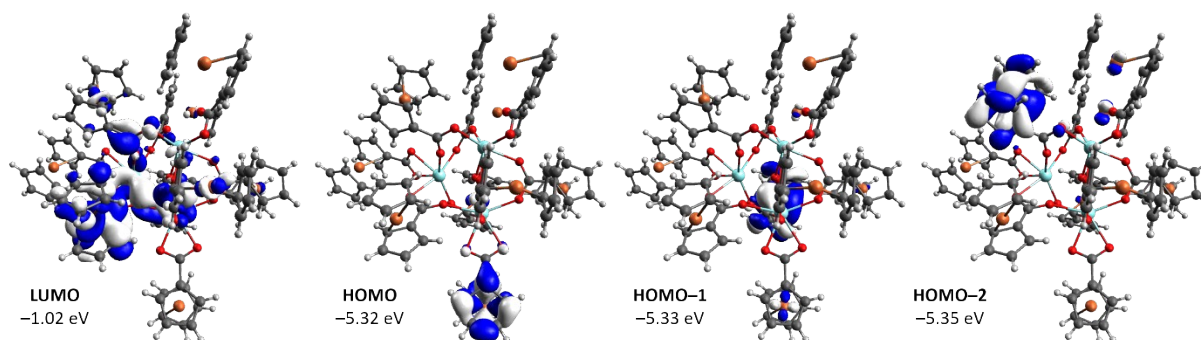

**Figure S13.** Plots of the frontier orbitals (contours plotted at  $\pm 0.02$  ( $e/\text{bohr}^3$ )<sup>1/2</sup>) and their energies of **Y<sub>t</sub>** (B3LYP, def2-TZVP, def2/J, CPCM ( $\text{CH}_2\text{Cl}_2$ )) considering a 180° rotation of the first (bottom) fragment.

## Electronic Supplementary Information (ESI)

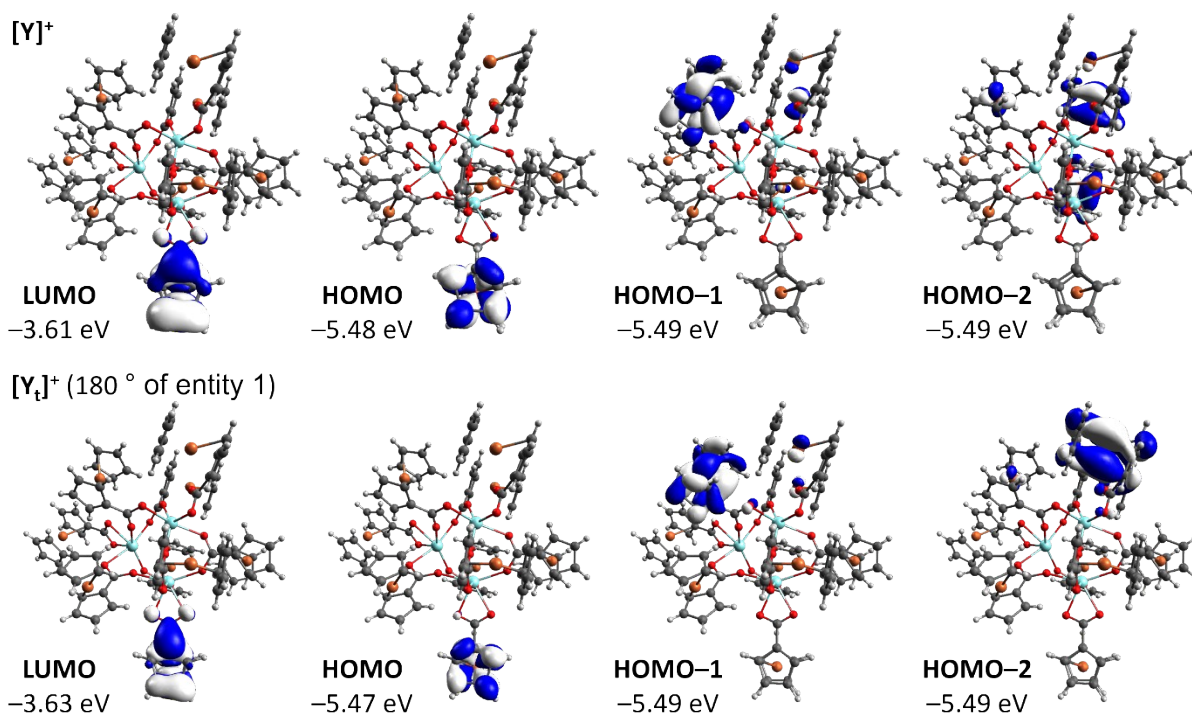

**Figure S14.** Plots of the  $\beta$ -frontier orbitals (contours plotted at  $\pm 0.02$  (e/bohr<sup>3</sup>)<sup>1/2</sup>) and their energies of [Y]<sup>+</sup> (top) and [Y<sub>1</sub>]<sup>+</sup> (bottom) (B3LYP, def2-TZVP, def2/J, CPCM (CH<sub>2</sub>Cl<sub>2</sub>)) considering a 180 ° rotation of the first (bottom) fragment.

### Second molecule in the asymmetric unit

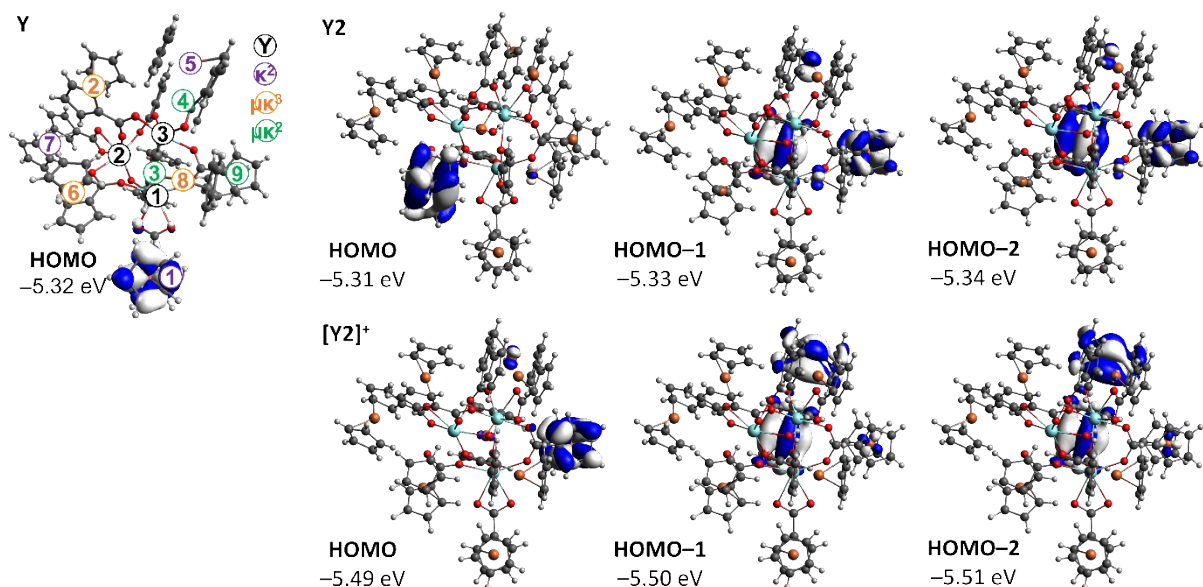

**Figure S15.** Plots of the  $\alpha$ -frontier orbitals (contours plotted at  $\pm 0.02$  (e/bohr<sup>3</sup>)<sup>1/2</sup>) and their energies of Y2 and its single-oxidized form [Y2]<sup>+</sup> (the second molecule in the asymmetric unit) (B3LYP, def2-TZVP, def2/J, CPCM (CH<sub>2</sub>Cl<sub>2</sub>)).

## Electronic Supplementary Information (ESI)

**Table S9.** Crystallographic data and structure refinement details for compounds **2 – 5**.

|                                                                   | <b>2</b>                                                                                       | <b>3</b>                                                                                       | <b>4</b>                                                                                       | <b>5</b>                                                                                       |
|-------------------------------------------------------------------|------------------------------------------------------------------------------------------------|------------------------------------------------------------------------------------------------|------------------------------------------------------------------------------------------------|------------------------------------------------------------------------------------------------|
| CCDC                                                              | 2248459                                                                                        | 2248460                                                                                        | 2248461                                                                                        | 2248462                                                                                        |
| Empirical formula                                                 | C <sub>78</sub> H <sub>86</sub> Fe <sub>6</sub> N <sub>4</sub> O <sub>18</sub> Sm <sub>2</sub> | C <sub>78</sub> H <sub>86</sub> Eu <sub>2</sub> Fe <sub>6</sub> N <sub>4</sub> O <sub>18</sub> | C <sub>78</sub> H <sub>86</sub> Fe <sub>6</sub> Gd <sub>2</sub> N <sub>4</sub> O <sub>18</sub> | C <sub>78</sub> H <sub>86</sub> Fe <sub>6</sub> N <sub>4</sub> O <sub>18</sub> Tb <sub>2</sub> |
| Formula mass (g·mol <sup>-1</sup> )                               | 2003.30                                                                                        | 2006.52                                                                                        | 2017.10                                                                                        | 2020.44                                                                                        |
| Temperature (K)                                                   | 120                                                                                            | 120                                                                                            | 100                                                                                            | 120                                                                                            |
| Wavelength (Å)                                                    | 1.54184                                                                                        | 1.54184                                                                                        | 1.54184                                                                                        | 1.54184                                                                                        |
| Crystal system                                                    | Monoclinic                                                                                     | Monoclinic                                                                                     | Monoclinic                                                                                     | Monoclinic                                                                                     |
| Space group                                                       | <i>P2<sub>1</sub>/c</i>                                                                        | <i>P2<sub>1</sub>/c</i>                                                                        | <i>P2<sub>1</sub>/c</i>                                                                        | <i>P2<sub>1</sub>/c</i>                                                                        |
| Unit cell dimensions (Å, °)                                       |                                                                                                |                                                                                                |                                                                                                |                                                                                                |
| <i>a</i>                                                          | 14.7209(5)                                                                                     | 14.7146(2)                                                                                     | 14.6899(5)                                                                                     | 14.6912(2)                                                                                     |
| <i>b</i>                                                          | 11.9096(3)                                                                                     | 11.9172(2)                                                                                     | 11.9110(5)                                                                                     | 11.9184(1)                                                                                     |
| <i>c</i>                                                          | 22.3766(8)                                                                                     | 22.3816(3)                                                                                     | 22.3609(9)                                                                                     | 22.3365(2)                                                                                     |
| α                                                                 | 90                                                                                             | 90                                                                                             | 90                                                                                             | 90                                                                                             |
| β                                                                 | 106.077(4)                                                                                     | 105.931(2)                                                                                     | 105.911(4)                                                                                     | 105.982(1)                                                                                     |
| γ                                                                 | 90                                                                                             | 90                                                                                             | 90                                                                                             | 90                                                                                             |
| <i>V</i> (Å <sup>3</sup> )                                        | 3769.6(2)                                                                                      | 3774.03(10)                                                                                    | 3762.6(3)                                                                                      | 3759.85(7)                                                                                     |
| <i>Z</i>                                                          | 2                                                                                              | 2                                                                                              | 2                                                                                              | 2                                                                                              |
| <i>D</i> <sub>calc</sub> (Mg·m <sup>-3</sup> )                    | 1.765                                                                                          | 1.766                                                                                          | 1.780                                                                                          | 1.785                                                                                          |
| Absorption coefficient (mm <sup>-1</sup> )                        | 21.075                                                                                         | 21.263                                                                                         | 20.796                                                                                         | 18.651                                                                                         |
| <i>F</i> (000)                                                    | 2012                                                                                           | 2016                                                                                           | 2020                                                                                           | 2024                                                                                           |
| θ range for data collection (°)                                   | 3.124 to 65.983                                                                                | 3.123 to 66.415                                                                                | 3.128 to 72.350                                                                                | 3.129 to 65.992                                                                                |
| Limiting indices                                                  | -16 ≤ <i>h</i> ≤ 17,<br>-8 ≤ <i>k</i> ≤ 14,<br>-26 ≤ <i>l</i> ≤ 25                             | -17 ≤ <i>h</i> ≤ 15,<br>-13 ≤ <i>k</i> ≤ 13,<br>-16 ≤ <i>l</i> ≤ 26                            | -18 ≤ <i>h</i> ≤ 17,<br>-14 ≤ <i>k</i> ≤ 11,<br>-27 ≤ <i>l</i> ≤ 19                            | -17 ≤ <i>h</i> ≤ 17,<br>-13 ≤ <i>k</i> ≤ 14,<br>-21 ≤ <i>l</i> ≤ 26                            |
| Reflections collected                                             | 16313                                                                                          | 12567                                                                                          | 14950                                                                                          | 19070                                                                                          |
| Reflections unique / <i>R</i> <sub>int</sub> <sup>a)</sup>        | 6536 / 0.0477                                                                                  | 6516 / 0.0347                                                                                  | 7264 / 0.0554                                                                                  | 6478 / 0.0331                                                                                  |
| Max. and min. transmission                                        | 1.00000 and 0.16766                                                                            | 1.00000 and 0.55597                                                                            | 1.00000 and 0.07629                                                                            | 1.00000 and 0.38114                                                                            |
| Data / restraints / parameters                                    | 6536 / 5 / 385                                                                                 | 6516 / 2 / 499                                                                                 | 7264 / 3 / 493                                                                                 | 6478 / 2 / 499                                                                                 |
| Goodness-of-fit on <i>F</i> <sup>2b)</sup>                        | 1.083                                                                                          | 1.008                                                                                          | 1.026                                                                                          | 1.016                                                                                          |
| Final <i>R</i> indices [ <i>I</i> > 2σ( <i>I</i> )] <sup>c)</sup> | <i>R</i> <sub>1</sub> = 0.0489, <i>wR</i> <sub>2</sub> = 0.1215                                | <i>R</i> <sub>1</sub> = 0.0303, <i>wR</i> <sub>2</sub> = 0.0631                                | <i>R</i> <sub>1</sub> = 0.0480, <i>wR</i> <sub>2</sub> = 0.1202                                | <i>R</i> <sub>1</sub> = 0.0272, <i>wR</i> <sub>2</sub> = 0.0647                                |
| <i>R</i> indices (all data) <sup>c)</sup>                         | <i>R</i> <sub>1</sub> = 0.0593, <i>wR</i> <sub>2</sub> = 0.1275                                | <i>R</i> <sub>1</sub> = 0.0397, <i>wR</i> <sub>2</sub> = 0.0660                                | <i>R</i> <sub>1</sub> = 0.0583, <i>wR</i> <sub>2</sub> = 0.1277                                | <i>R</i> <sub>1</sub> = 0.0327, <i>wR</i> <sub>2</sub> = 0.0667                                |
| Largest diff. peak / hole (e·Å <sup>-3</sup> )                    | 2.123 / -1.622                                                                                 | 1.303 / -0.534                                                                                 | 1.693 / -1.007                                                                                 | 0.934 / -0.558                                                                                 |

a)  $R_{int} = \frac{\sum |F_0^2 - F_0^2(mean)|}{\sum F_0^2}$ ; where  $F_0^2(mean)$  is the average intensity of symmetry equivalent diffractions.

b)  $S = \left[ \frac{\sum w(F_0^2 - F_c^2)^2}{(n - p)} \right]^{1/2}$ ; where *n* = number of reflections, *p* = number of parameters.



## Electronic Supplementary Information (ESI)

$$c) R = \frac{\sum (|F_0| - |F_c|)}{\sum |F_0|}, wR = \left[ \frac{\sum (w(F_0^2 - F_c^2)^2)}{\sum (wF_0^4)} \right]^{1/2}$$

## Electronic Supplementary Information (ESI)

**Table S10.** Crystallographic data and structure refinement details for compounds **6** and **7**.

|                                                                   | { <b>6</b> ·[NBu <sub>4</sub> ]Cl} <sub>2</sub>                                                                                                                   | { <b>7</b> ·[NBu <sub>4</sub> ]Cl·Et <sub>2</sub> O·THF} <sub>2</sub>                                                  |
|-------------------------------------------------------------------|-------------------------------------------------------------------------------------------------------------------------------------------------------------------|------------------------------------------------------------------------------------------------------------------------|
| CCDC                                                              | 2248463                                                                                                                                                           | 2248464                                                                                                                |
| Empirical formula                                                 | C <sub>131</sub> H <sub>154</sub> ClFe <sub>9</sub> Gd <sub>3</sub> N <sub>2</sub> O <sub>19</sub><br>[+ solvent + [NBu <sub>4</sub> ]Cl]                         | C <sub>1094</sub> H <sub>1318</sub> Cl <sub>8</sub> Fe <sub>72</sub> N <sub>16</sub> O <sub>163</sub> Tb <sub>24</sub> |
| Moiety Formula                                                    | C <sub>99</sub> H <sub>82</sub> Fe <sub>9</sub> Gd <sub>3</sub> O <sub>19</sub> , 2(C <sub>16</sub> H <sub>36</sub> N), Cl<br>[+ solvent + [NBu <sub>4</sub> ]Cl] | 25418.45                                                                                                               |
| Formula mass (g·mol <sup>-1</sup> )                               | 3070.40<br>[+ solvent + [NBu <sub>4</sub> ]Cl]                                                                                                                    |                                                                                                                        |
| Temperature (K)                                                   | 120                                                                                                                                                               | 100                                                                                                                    |
| Wavelength (Å)                                                    | 1.54184                                                                                                                                                           | 0.71073                                                                                                                |
| Crystal system                                                    | Monoclinic                                                                                                                                                        | Monoclinic                                                                                                             |
| Space group                                                       | <i>P</i> 2 <sub>1</sub> / <i>n</i>                                                                                                                                | <i>P</i> 2 <sub>1</sub> / <i>n</i>                                                                                     |
| Unit cell dimensions (Å, °)                                       | <i>a</i> 15.2698(6)<br><i>b</i> 42.9380(2)<br><i>c</i> 47.5450(2)<br><i>α</i> 90<br><i>β</i> 90.118(4)<br><i>γ</i> 90                                             | 15.2447(10)<br>43.0160(3)<br>47.3890(3)<br>90<br>90.239(2)<br>90                                                       |
| <i>V</i> (Å <sup>3</sup> )                                        | 31173(2)                                                                                                                                                          | 31076(4)                                                                                                               |
| <i>Z</i>                                                          | 8                                                                                                                                                                 | 1                                                                                                                      |
| <i>D</i> <sub>calc</sub> (Mg·m <sup>-3</sup> )                    | 1.308                                                                                                                                                             | 1.358                                                                                                                  |
| Absorption coefficient (mm <sup>-1</sup> )                        | 15.173                                                                                                                                                            | 2.231                                                                                                                  |
| <i>F</i> (000)                                                    | 12392                                                                                                                                                             | 12866                                                                                                                  |
| θ range for data collection (°)                                   | 3.072 to 65.000                                                                                                                                                   | 2.596 to 25.000                                                                                                        |
| Limiting indices                                                  | -16 ≤ <i>h</i> ≤ 17,<br>-50 ≤ <i>k</i> ≤ 50,<br>-46 ≤ <i>l</i> ≤ 55                                                                                               | -18 ≤ <i>h</i> ≤ 18,<br>-51 ≤ <i>k</i> ≤ 51,<br>-56 ≤ <i>l</i> ≤ 56                                                    |
| Reflections collected                                             | 118715                                                                                                                                                            | 266802                                                                                                                 |
| Reflections unique / <i>R</i> <sub>int</sub> <sup>a)</sup>        | 52855 / 0.1708                                                                                                                                                    | 54494 / 0.0524                                                                                                         |
| Max. and min. transmission                                        | 1.00000 and 0.31155                                                                                                                                               | 0.99999 and 0.34871                                                                                                    |
| Data / restraints / parameters                                    | 52855 / 5106 / 2687                                                                                                                                               | 54494 / 5353 / 3161                                                                                                    |
| Goodness-of-fit on <i>F</i> <sup>2b)</sup>                        | 0.803                                                                                                                                                             | 1.117                                                                                                                  |
| Final <i>R</i> indices [ <i>I</i> > 2σ( <i>I</i> )] <sup>c)</sup> | <i>R</i> <sub>1</sub> = 0.0893, <i>wR</i> <sub>2</sub> = 0.1778                                                                                                   | <i>R</i> <sub>1</sub> = 0.0669, <i>wR</i> <sub>2</sub> = 0.1422                                                        |
| <i>R</i> indices (all data) <sup>c)</sup>                         | <i>R</i> <sub>1</sub> = 0.2207, <i>wR</i> <sub>2</sub> = 0.2415                                                                                                   | <i>R</i> <sub>1</sub> = 0.0758, <i>wR</i> <sub>2</sub> = 0.1459                                                        |
| Largest diff. peak / hole (e·Å <sup>-3</sup> )                    | 1.054 / -1.099                                                                                                                                                    | 4.414 / -2.988                                                                                                         |
| Squeeze data                                                      | 8634.4 Å <sup>3</sup> ; 1908 e <sup>-</sup> /cell                                                                                                                 | 5383.4 Å <sup>3</sup> ; 1693.6 e <sup>-</sup> /cell                                                                    |

a)  $R_{int} = \frac{\sum |F_0^2 - F_0^2(mean)|}{\sum F_0^2}$ ; where  $F_0^2(mean)$  is the average intensity of symmetry equivalent diffractions.

b)  $S = \left[ \frac{\sum w(F_0^2 - F_c^2)^2}{(n - p)} \right]^{1/2}$ ; where  $n$  = number of reflections,  $p$  = number of parameters.

c)  $R = \frac{\sum (|F_0| - |F_c|)}{\sum |F_0|}$ ,  $wR = \left[ \frac{\sum (w(F_0^2 - F_c^2)^2)}{\sum (wF_0^4)} \right]^{1/2}$

## Electronic Supplementary Information (ESI)

### Miscellaneous

In case of compound **2** we could not perform a proper face absorption correction as we did not measure a crystal movie. The crystallographic reviewer asked for a potential re-measurement, which we could not do as well as it was not possible to obtain sufficiently large crystals. On request of this referee we should add here two graphs:

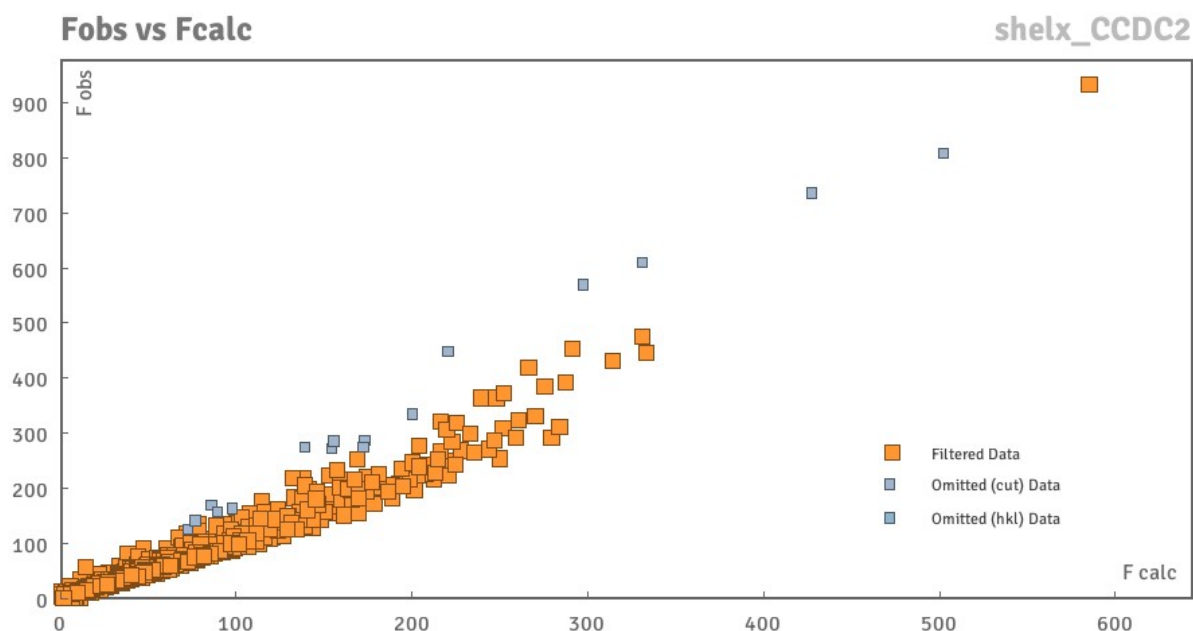

**Reviewer comment:** “ ... At the very least, please perform a proper face absorption correction. If you can not do this, then please add the attached graph to the SI, together with an explanation why it is impossible to recollect new data and/or perform a face absorption correction. ... ”

Compound **6** and **7** are isomorph. While in case of compound **7** comparatively large crystals could be obtained, allowing measurement with Mo K $\alpha$  radiation, in case of **6** the crystal were much smaller. Furthermore, already **7** did possess a large VOID volume, although several packing solvent molecules could be refined. In case **6**, however, not. From our point of view missing packing solvents molecules and/or disordered one lead to a very weak diffractivity of the crystals **6**. Further information are given in the manuscript and in the .cif files as well.

## Electronic Supplementary Information (ESI)

Review comment: “ If you wish to publish this structure, please report the contents of the mask properly and add the attached graphs to your SI together with a detailed explanation why it was impossible to obtain better data for this material. ... “

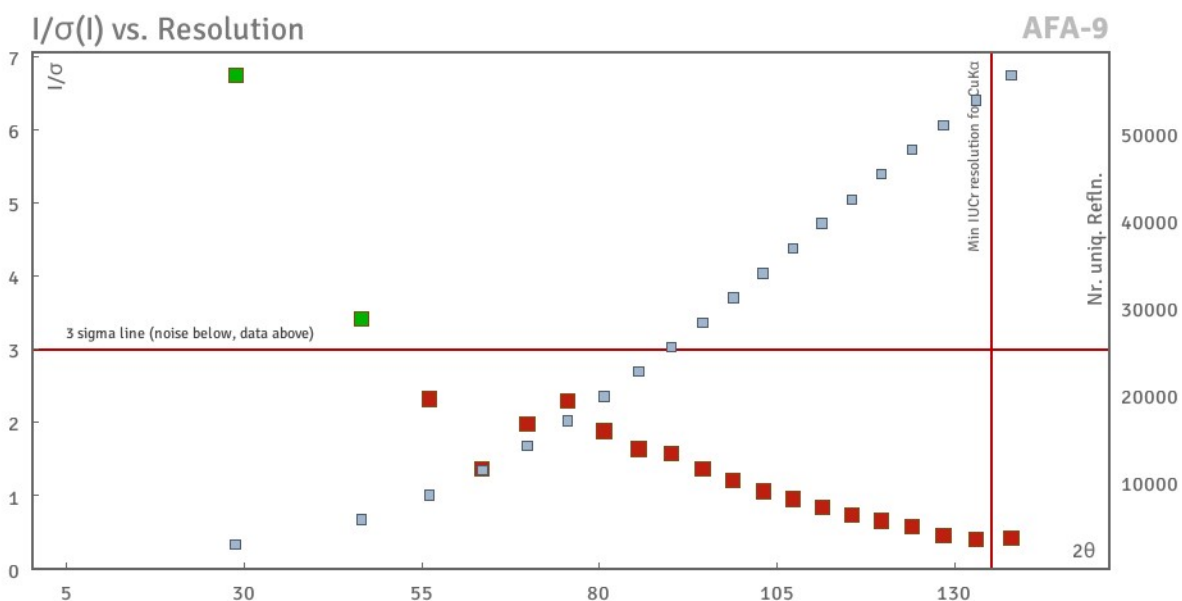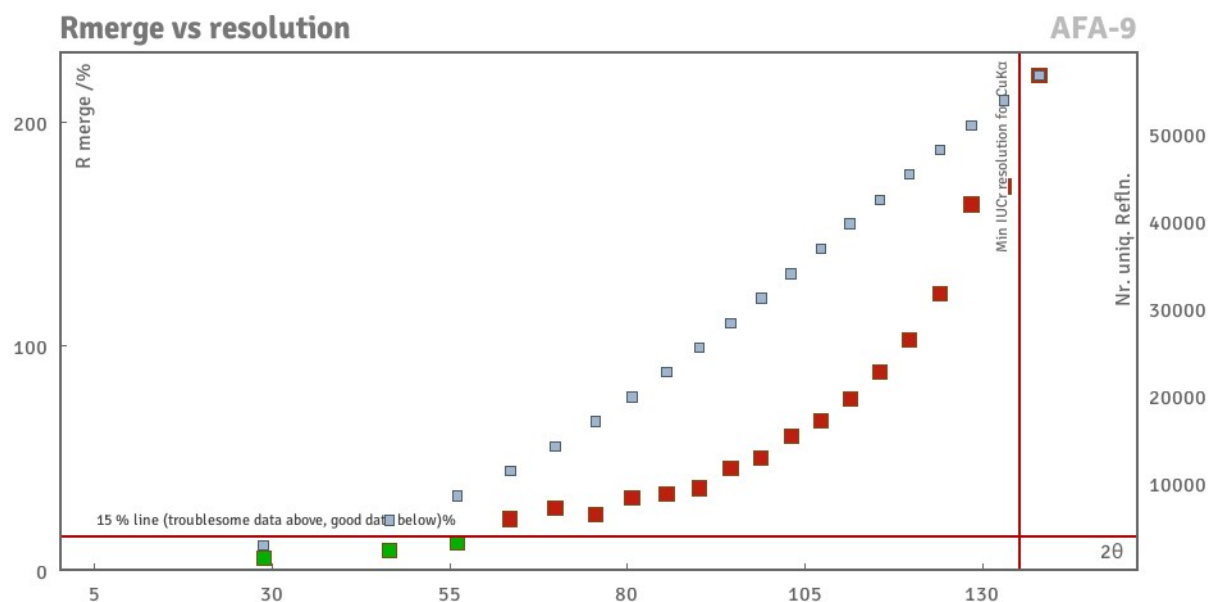

## Electronic Supplementary Information (ESI)

### 5- Reference

- 1 R. D. Shannon, *Acta Crystallogr. Sect. A*, 1976, **32**, 751–767.

---

<sup>1</sup> M. Llunell, D. Casanova, J. Cirera, P. Alemany, S. Alvarez, Shape 2.1 program package, 2013, University of Barcelona.
